1 **The genome of North American beaver provides insights into**  
2 **the mechanisms of its longevity and cancer resistance**

3

4 Quanwei Zhang<sup>1</sup>, Gregory Tomblin<sup>2</sup>, Julia Ablaeva<sup>2</sup>, Lei Zhang<sup>1</sup>, Xuming Zhou<sup>3</sup>, Zachary Smith<sup>2</sup>,  
5 Alus M. Xiaoli<sup>4</sup>, Zhen Wang<sup>1</sup>, Jhih-Rong Lin<sup>1</sup>, M. Reza Jabalameli<sup>1</sup>, Joydeep Mitra<sup>1</sup>, Nha Nguyen<sup>1</sup>,  
6 Jan Vijg<sup>1</sup>, Andrei Seluanov<sup>2</sup>, Vadim N. Gladyshev<sup>3</sup>, Vera Gorbunova<sup>2</sup>, Zhengdong D. Zhang<sup>1,\*</sup>

7 1 Department of Genetics, Albert Einstein College of Medicine, Bronx, NY, USA

8 2 Department of Biology, University of Rochester, Rochester, NY 14627, USA

9 3 Division of Genetics, Department of Medicine, Brigham and Women's Hospital, Harvard  
10 Medical School, Boston, MA, USA

11 4 Departments of Medicine and Developmental and Molecular Biology, Albert Einstein College  
12 of Medicine, Bronx, NY, USA

13 \* Corresponding author (E-mail: [qwz.zdzlab@gmail.com](mailto:qwz.zdzlab@gmail.com))

14

15 Running title: Beaver genome annotation

16

17 Keywords: Beaver genome, gene duplication, positive selection, longevity

18

## 19 **Abstract**

20 The North American beaver (*Castor canadensis*) is an exceptionally long-lived and cancer-resistant  
21 rodent species, and thus an excellent model organism for comparative genomic studies of  
22 longevity. Here, we utilize a significantly improved beaver genome assembly to assess evolutionary  
23 changes in gene coding sequences, copy number, and expression. We found that the beaver  
24 *Aldh1a1*, a stem cell marker gene encoding an enzyme required for detoxification of ethanol and  
25 aldehydes, is expanded (~10 copies vs. two in mouse and one in human). We also show that the  
26 beaver cells are more resistant to ethanol, and beaver liver extracts show higher ability to  
27 metabolize aldehydes than the mouse samples. Furthermore, *Hpgd*, a tumor suppressor gene, is  
28 uniquely duplicated in the beaver among rodents. Our evolutionary analysis identified beaver genes  
29 under positive selection which are associated with tumor suppression and longevity. Genes  
30 involved in lipid metabolism show positive selection signals, changes in copy number and altered  
31 gene expression in beavers. Several genes involved in DNA repair showed a higher expression in  
32 beavers which is consistent with the trend observed in other long-lived mammals. In summary, we  
33 identified several genes that likely contribute to beaver longevity and cancer resistance, including  
34 increased ability to detoxify aldehydes, enhanced tumor suppression and DNA repair, and altered  
35 lipid metabolism.

36

## 37 **Introduction**

38 Rodent species show considerable variation in their maximum lifespans. Recent studies of several  
39 long-lived rodents have provided new insights into the mechanisms of longevity. For example,  
40 studies of the naked mole rats found unique amino acid changes in proteins involved in DNA repair  
41 and cell cycle (Kim, Fang et al. 2011), insulin  $\beta$ -chain associated with insulin misfolding and  
42 diabetes (Fang, Seim et al. 2014), decreased expression of genes in insulin/Igf1 signaling in liver  
43 (Kim, Fang et al. 2011), and increased expression of genes involved in DNA repair signaling  
44 (MacRae, Croken et al. 2015). In blind mole rats, Tp53 protein was found with an amino acid  
45 change associated with human tumors. This mutation leads to partial inactivation of Tp53 function  
46 and promotes p53 binding to promoters of cell cycle arrest genes rather than apoptotic genes  
47 (Ashur-Fabian, Avivi et al. 2004).

48 North American beaver (*Castor Canadensis*) has a maximum lifespan over 24 years and, with  
49 adults weighing from 24 to 71 lbs, is the second largest rodent species. It also shows resistance to  
50 cancer, despite a large body size and a long lifespan. Studies of several animals with large body  
51 sizes, long lifespans, and yet low rates of cancer revealed their enhanced antitumor mechanisms.  
52 For example, elephant, the biggest land mammal, was found have enhanced Tp53 activity by Tp53  
53 expansion (~20 copies) (Abegglen, Caulin et al. 2015), while bowhead whale, the possibly longest-

54 lived mammal, shows signals of natural selection in aging and cancer-associated genes (Keane,  
55 Semeiks et al. 2015). How beaver evolved to have cancer resistance and longevity is not clear.

56 The beaver genome assembly was first released in 2017 (Lok, Paton et al. 2017). Before analyzing  
57 the beaver genome, we re-sequenced and re-assembled the beaver genome to improve the  
58 assembly quality in terms of both the contig length and the assembly completeness (Zhou, Dou et  
59 al. 2020). To find potentially novel mechanisms of cancer resistance and longevity, using our  
60 improved beaver genome assembly, we explored three major types of signals of natural selection  
61 in beaver genome compared to other rodents: changes in gene copy numbers, positive selection  
62 that favored changes in amino acid residues, which further affect gene structure, interaction, and  
63 function, and changes in gene expression. Through a systematic, comparative analysis, we  
64 identified a striking multiplication of *Aldh1a1*, a stem cell marker gene, by around 10 copies in the  
65 beaver genome and beaver-specific expansion of several genes, including *Hpgd*, a tumor  
66 suppressor gene, and *Cyp19a1*, a gene involved in estrogen biosynthesis and linked to human  
67 longevity (Corbo, Ulizzi et al. 2011). We also found several genes associated with lipid metabolism,  
68 oxidation reduction, cancer suppression under positive selection and increased expression of DNA  
69 repair genes in beaver compared to mouse, consistent with observations in other long-lived  
70 species. In addition, we discovered that genes associated with lipid metabolism were likely under  
71 natural selection through changes in coding sequences, gene copy numbers, and gene expression  
72 levels.

## 73 **Results**

### 74 **Genome annotation and phylogeny**

75 Our beaver genome assembly (Zhou, Dou et al. 2020) consists of 739,342 scaffolds, with scaffold  
76 N50 = 24.31 Mb (the maximum was 93.06 Mb). This beaver genome assembly has a much higher  
77 completeness, with 95% complete BUSCOs (Benchmarking Universal Single-Copy Orthologs)  
78 (Simao, Waterhouse et al. 2015), compared to 83.1% of the beaver genome published previously  
79 (scaffold N50 = 318 kb and the maximum was 4.2 Mb) (Lok, Paton et al. 2017).

80 For gene annotation and downstream analysis, we selected scaffolds longer than 300 bp. There  
81 were 250,435 such scaffolds, and together they count for 96.6% of the assembled sequences.  
82 Using the Maker2 pipeline (Holt and Yandell 2011), we predicted 26,515 beaver genes with support  
83 from either transcriptomes or protein sequences (**Figure 1A**). Among these genes, 20,670 (78%)  
84 were found with functional domains by InterProScan (v5.25) (Jones, Binns et al. 2014). A genome  
85 is considered well annotated if more than 90% genes have an annotation edit distance (AED) score,  
86 which measures the goodness of fit of each gene to the evidence supporting it, lower than 0.5, and  
87 over 50% proteins contain a recognizable domain (Campbell, Holt et al. 2014). In our beaver

88 genome annotation, ~90.7% gene models have AED scores lower than 0.5 (**Figure 1 -**  
89 **Supplement Figure S1**) and 78% gene products contain domains.

90 A total of 14 rodent species, 2 rabbit species, and human and chimpanzee (as outgroup species),  
91 are included in our analysis. With 5,087 single copy genes across them, we generated their  
92 phylogeny and estimated that beaver and its evolutionally closest species in our set, Ord's Kangaroo  
93 rat, separated about 46 million years ago (**Figure 1B**).

#### 94 **Significant expansion of beaver *Aldh1a1* and its functional consequences**

95 Using CAFE 3 (Han, Thomas et al. 2013), we identified significant (FDR<0.01) copy number  
96 increases of eight beaver genes (**Figure 2 – Supplement Figure S2**, see **Methods** for details).  
97 Most of these increases are not specific to beavers. One of them, the expansion of *Aldh1a1*,  
98 however, is striking in beaver, suggesting this expansion could be important for its cancer  
99 resistance and/or longevity. Therefore, we examined this gene in detail.

100 **Expansion of beaver *Aldh1a1*** Compared with humans and chimpanzees, which have one copy  
101 of *Aldh1a1*, most rodent species have two copies of the gene (its close paralog in mouse is named  
102 as *Aldh1a7*). This indicates the duplication likely happened before the last common ancestor of  
103 rodents (**Figure 2 – Supplement Figure S3**). In contrast, 10 copies of *Aldh1a1* were predicted in  
104 the beaver genome, among which 2 copies are predicted as pseudogenes because of frameshift  
105 indels (**Figure 2 – Supplement Figure S4A, S4B**). One copy (ID: 266.2) has relatively lower  
106 annotation quality with two repeat fragments, which may indicate a prediction with a mixture from  
107 two copies of *Aldh1a1*.

108 We next examined every predicted copy of beaver *Aldh1a1* and carried out qPCR to experimentally  
109 quantify duplication events. We compared synteny of the *Aldh1a1* locus among beaver, human,  
110 and mouse (**Figure 2A**). Missing or unordered genes in a genomic region may indicate a poor  
111 assembly quality. A perfect match of the order of corresponding genes indicates good quality of  
112 genome assembly at this locus. After duplication, different gene copies evolved independently and  
113 accumulated differences in both sequence and gene structure. Using Apollo (Lee, Helt et al. 2013)  
114 and RNA-seq data, we manually improved the gene annotation of seven functional copies of beaver  
115 *Aldh1a1* (excluding two pseudogenes and the copy 266.2), which all have different gene structures  
116 (**Figure 2B**). Bona fide gene copies likely encode homologous proteins with different substitutions.  
117 We picked three sites in the coding sequences of exon 4 (**Figure 3C**), which can distinguish the  
118 seven copies from one another (**Figure 2C – Supplement Figure S4C**). The alignment of RNA-  
119 seq reads from beaver individuals indicates that those variable sites are genuine, and the different  
120 copies were transcribed simultaneously. While the RNA-seq read coverage at these variable sites  
121 was relatively low for the copy 266.5, we also analyzed another site, where the copy 266.5 is distinct

122 from all other copies and with much higher RNA-seq reads coverage (**Figure 2 – Supplement**  
123 **Figure S4D**). To further validate the duplication of *Aldh1a1*, we performed qPCR analysis, which  
124 showed that there are around 10 copies of *Aldh1a1* in the beaver genome (**Figure 2D**).

125 **Duplicated *Aldh1a1* genes are transcribed and result in higher *Aldh1a1* protein levels** All the  
126 predicted beaver *Aldh1a1* genes have regular gene structures with introns, and only two of them  
127 were identified as pseudogenes by GeneWise (Birney, Clamp et al. 2004) (see **Methods** and  
128 **Figure 2 – Supplement Figure S5**). At least seven copies of *Aldh1a1* are of high annotation quality  
129 and transcribed in parallel in beaver individuals (**Figure 2C**). Based on their expression patterns in  
130 different tissues, beaver *Aldh1a1* genes can be clustered into three groups (**Figure 2E**). As  
131 expected, the two pseudogenes show very low expression in all the tissues. While the highest  
132 expression of three copies in liver appears to be liver-specific, the expression of other copies is  
133 moderate in both liver and brain. To understand the overall transcriptional activity of *Aldh1a1* in  
134 beaver, we compared expression levels of *Aldh1a1* genes in liver and brain between beaver and  
135 mouse using RNA-seq data (see **Methods** for details). The overall expression of *Aldh1a1* was  
136 significantly higher in beaver liver (FDR = 2.23E-28, fold change = 10.04) and brain (FDR = 2.24E-  
137 12, fold change = 9.54) than that in the same mouse tissue, respectively (**Figure 2F**). We also  
138 examined protein level of *Aldh1a1* by Western blotting. Using cytosolic extracts from liver cells of  
139 beaver and mouse, we found that there is more *Aldh1a1* in beaver liver tissue than mouse liver  
140 tissue (**Figure 2G-H**). Together these results indicate that duplicated *Aldh1a1* copies are  
141 transcribed and result in higher protein levels in beaver tissue.

142

143 **Potential positive selection of *Aldh1a1* duplication** Gene duplications are often under relaxed  
144 purifying selection, as increased gene dosage tends to provide burden on the cell. The  
145 exceptional level of duplication of *Aldh1a1* in beaver, however, suggests the presence of a  
146 positive (i.e., adaptive) selection. *Aldh1a1* belongs to the *Aldh* super family: there are 19 and 21  
147 *Aldh* genes in the human and mouse genomes, respectively. To investigate whether the  
148 duplication of *Aldh1a1* in beaver is a compensation for loss of other *Aldh* genes or a result of  
149 natural selection, we manually checked all *Aldh* genes in the beaver genome (**Figure 2 –**  
150 **Supplement Figure S6**). Except *Aldh1a1*, beavers have the same set of *Aldh* genes as mice and  
151 humans with regular gene structures and open reading frames (**Figure 2 – Supplement Figure**  
152 **S7**). This conservation of other *Aldh* genes indicates that the significant expansion of beaver  
153 *Aldh1a1* is likely a result of positive selection during evolution.

154

155 **Beaver cells show enhanced tolerance of alcohol and aldehydes** *Aldh* gene products can  
156 protect organisms against damage from oxidative stress by processing toxic aldehydes generated

157 as a result of lipid peroxidation (Singh, Brocker et al. 2013). Both alcohol and endogenous  
158 aldehydes can lead to DNA damage and increase mutations in stem cells (Garaycochea, Crossan  
159 et al. 2018). We next tested the resistance of beaver cells to ethanol and aldehydes. When treated  
160 with 18% ethanol for 7 hours both beaver and mouse lung fibroblasts showed significantly  
161 decreased cell viability (**Figure 3A**). However, the reduction of cell viability was significantly lower  
162 for beaver lung fibroblasts than mouse cells ( $P = 0.002$ ). This result suggests that higher *Aldh1a1*  
163 levels in beaver cells lead to higher alcohol resistance. We also tested *Aldh1a1* activity for three  
164 types of endogenous aldehydes: all-trans-retinal (RET), malonaldehyde (MDA) and 4-  
165 hydroxynonenal (HNE). Beaver and mouse liver extracts did not differ in their ability to process  
166 RET. However, beaver extract showed much stronger activity on MDA and HNE (**Figure 3B**). This  
167 result clearly shows that beaver liver possesses higher *Aldh1a1* activity than mouse liver.

168

### 169 **Beaver-specific expansion of conserved genes**

170 We identified 18 gene candidates for potential beaver-specific expansion and successfully  
171 validated five of them by qPCR (see **Methods** for details): *Hpgd* (*15-hydroxyprostaglandin*  
172 *dehydrogenase*), *Fitm1* (*Fat storage inducing transmembrane protein 1*), *Cyp19a1* (*Cytochrome*  
173 *P450 family 19 subfamily A member 1*), *Pla2g4c* (*Phospholipase A2 Group IVC*), and *Cenpt*  
174 (*Centromere protein T*) (**Figure 4A - Supplement Figure S8-S11**). There are two copies of *Hpgd*,  
175 a well-known tumor suppressor gene, in the beaver genome. The *Hpgd* loci in beaver, mouse, and  
176 human genomes show good synteny (**Figure 4B**), indicating a good assembly quality at this region.  
177 The beaver-specific duplication of *Hpgd* was validated by real-time qPCR (**Figure 4A**). We aligned  
178 beaver and mouse *Hpgd* sequences together (**Figure 4C**). While the two copies of beaver *Hpgd*  
179 have a high degree of sequence similarity, there are several amino acid residue differences. RNA-  
180 seq reads from individual beavers covered variable sites in both *Hpgd* copies, indicating that both  
181 copies are transcribed (and likely functional) and sequence differences were not due to DNA  
182 sequencing errors but instead divergent evolution after the duplication (**Figure 4D**). *Hpgd* is a tumor  
183 suppressor of many cancer types, including cancer of liver (Lu, Han et al. 2014), colon (Myung,  
184 Rerko et al. 2006), lung (Ding, Tong et al. 2005), and breast (Wu, Liu et al. 2017). Our RNA-seq  
185 data analysis showed although *Hpgd* was not differentially expressed in brain between beavers  
186 and mice, it was expressed significantly higher in beaver liver (fold change = 4.39, FDR = 4.56E-  
187 40), where *Hpgd* is more transcriptionally active (**Figure 4E**). The duplication of *Hpgd* and its higher  
188 expression likely contribute to the cancer resistance of beavers.

189

### 190 **Beaver genes under positive selection are associated with tumor suppression and longevity**

191 We identified 21 beaver genes putatively under positive selection (FDR < 0.01, **Table 1**,  
192 **Supplementary file 1**), using 'branch site' model (Zhang, Nielsen et al. 2005) conducted in

193 PosiGene (Sahm, Bens et al. 2017) pipeline followed by manual curation (see **Methods** for details).  
194 Although not enriched at the pathway level, several top genes under positive selection are known  
195 to be associated with lipid metabolism (e.g., *Erlin2*, *Fabp3* and *Cilp2*), tumor suppression (e.g.,  
196 *Vwa5a* and *Fabp3*), and oxidation reduction process (e.g., *Hsd17b1*, *Fabp3*, *Cox15*, *Cyb5a*, and  
197 *Aoc1*). Especially, several genes may be associated with aging/longevity. Different alleles of  
198 *Hsd17b1* were found significantly associated with human longevity in females (Scarabino, Scacchi  
199 et al. 2015). A single knockout of *Mtbp* in mice led to an extension of lifespan (Grieb, Boyd et al.  
200 2016). Knockdown of *Mrpl37* increased lifespan of *C. elegans* by 41% on average (Houtkooper,  
201 Mouchiroud et al. 2013). Long-lived bats have greater abundance of *Fabp3* in muscle mitochondria  
202 than that of short-lived mice, and thus its regulation of lipid may influence mitochondrial function  
203 (Pollard, Ingram et al. 2019). *FABP3* also acts as a tumor suppressor in human embryonic cancer  
204 cells and breast cancer (Song, Shen et al. 2012). In addition, *Ptx3* is an inflammatory protein, which  
205 protects the organism against pathogens and controls autoimmunity, and is involved in tissue  
206 remodeling and cancer development (Doni, Stravalaci et al. 2019).

207 *Mtbp* (Mdm2 Binding Protein) interacts with oncoprotein mouse double minute 2 (*Mdm2*) and  
208 enhances its stability, which promotes degradation of *Tp53* (**Figure 5 – Supplement Figure S12**).  
209 Sites with positive selection signals were identified in exons encoding the “mid-domain” and the “C-  
210 domain” of the *Mtbp* protein (**Figure 5A**). In addition to codon changes (i.e., selection signals  
211 identified by PosiGene (Sahm, Bens et al. 2017)), there are also indels in beaver *Mtbp*, compared  
212 with the ortholog from other rodent species. Especially, there is a 15-bp insertion in exon 18 of  
213 beaver *Mtbp*, which resembles an insertion at a similar location in *Mtbp* of the long-lived naked  
214 mole rat. We explore potential functional effects of changes in codons and indels using PROVEAN  
215 (Choi and Chan 2015), PolyPehn2 (Adzhubei, Jordan et al. 2013) and CADD (Rentzsch, Witten et  
216 al. 2019) by considering changes from those in human genome (human sequences are the  
217 consensus sequence at those loci) to those in beaver genome (**Figure 5B**). Two sites under  
218 positive selection are consistently predicted to be deleterious, suggesting they could result in  
219 decreased *Mtbp* function and hence decrease the stability of *Mdm2*, leading to higher *Tp53* activity.  
220 We also checked the top three sites under positive selection identified in the multiple sequence  
221 alignment of *Mtbp* from 62 mammals (**Figure 5 – Supplement Figure S12B-D**). We checked a few  
222 other sequence changes at the positive selection sites in other mammals and found only changes  
223 in beaver *Mtbp* were predicted as deleterious (**Figure 5 – Supplement Figure S12D**), which may  
224 contribute to its cancer resistance. Haploinsufficiency of *Mtbp* in mice delays spontaneous cancer  
225 development and extend lifespan by enhancing *Tp53* function (Grieb, Boyd et al. 2016).

226

227 **Beaver displays enhanced expression of DNA repair genes and changes in genes involved**  
228 **in lipid metabolism**

229 Among 12,090 genes with one-to-one orthology between beaver and mouse, we detected 2,892  
230 (1,652 up-regulated and 1,240 down-regulated) and 2,765 (1,534 up-regulated and 1,231 down-  
231 regulated) differentially expressed genes (fold change > 2.5 and FDR < 0.001) in liver and brain,  
232 respectively, between beavers and mice (see **Methods** for details). Among REACTOM pathways,  
233 both up-regulated and down-regulated differentially expressed genes were enriched in lipid  
234 metabolism pathway in both liver and brain (**Figure 6**). Such result indicates significantly divergent  
235 evolution of lipid metabolism between beaver and mouse. Up-regulated genes in both livers and  
236 brains of beavers were also enriched in hemostasis, DNA repair, and cell cycle pathways.  
237 Especially, “nucleotide excision repair” and “base excision repair” pathways are enriched with up-  
238 regulated genes in beaver brains. Up-regulated genes in beaver livers are enriched in the Tp53  
239 signaling pathway among 50 hallmark gene sets from the Molecular Signatures Database  
240 (Subramanian, Tamayo et al. 2005), which represent well-defined biological states or processes  
241 with coherent expression. Linking to human longevity and age-related diseases (Wolfson,  
242 Budovsky et al. 2009), overexpression of genes in “focal adhesion” (**Figure 6A, 6B**) may also  
243 contribute to beaver’s longevity.

244 Among differentially expressed genes, *Igf2* (insulin-like growth factor 2) showed much higher  
245 expression in beaver liver than in mouse liver (FDR = 3.06E-135, top 20th up-regulated gene in  
246 beaver liver), and its binding protein *Igf2bp2* also shows significant up-regulation in beaver liver  
247 (FDR = 7.69E-07) (**Figure 6 – Supplement Figure S13**). Expression of *Igf2* significantly decreases  
248 after birth in liver for most mammals, including mouse and rat. Interestingly, *Igf2* and *Igf2bp2* show  
249 relatively higher expression levels in livers of naked mole rats and Damaraland mole rats (Fang,  
250 Seim et al. 2014, Ma and Gladyshev 2017), both long-lived rodents.

251

252 **Discussion**

253 *Aldh* gene products process aldehydes generated as a result of lipid peroxidation, thus protecting  
254 the organism from the consequence of oxidative stress (Singh, Brocker et al. 2013). A recent study  
255 showed that both alcohol and endogenous aldehydes damage chromosomes and increase the  
256 mutation rate of stem cells (Garaycochea, Crossan et al. 2018). We found that beaver cells exhibit  
257 better tolerance to ethanol than mouse cells and show strikingly enhanced capabilities for  
258 metabolizing malonaldehyde (MDA) and 4-hydroxynonenal (HNE) (**Figure 3**). While MDA is the  
259 most mutagenic aldehyde product of lipid peroxidation, HNE is the most toxic (Ayala, Munoz et al.  
260 2014). The *Aldh* upregulation occurs in mammals in response to lipid peroxidation (Vassalli 2019),  
261 which is a major source of endogenous aldehydes. Polyunsaturated fatty acids (PUFAs) are more  
262 susceptible to oxidation than monounsaturated fatty acids, and beavers have a high proportion of



263 PUFAs, which is unusual among mammals (Martysiak-Zurowska, Zalewski et al. 2009, Zalewski,  
264 Martysiak-Zurowska et al. 2009, Domaradzki, Florek et al. 2019). For example, beaver's tail fat  
265 contains over 80% unsaturated fatty acids (Zalewski, Martysiak-Zurowska et al. 2009). Studies of  
266 diving mammals indicate potential function of PUFAs in oxygen conservation, through reducing  
267 heart rate, to enhance their diving ability (Trumble and Kanatous 2012). Consistently, the heart rate  
268 of beavers is 100 beats/minute during rest and 50 beats/minute while diving (Muller-Schwarze  
269 2003), which is much lower than that (~250 beats/minutes) of other rodents (Carpenter and Marion  
270 2013). However, high level of PUFAs will result in increased lipid peroxidation, which is reversely  
271 correlated with lifespan of diverse species, including mammals (Hulbert, Kelly et al. 2014).  
272 Longevity of beavers indicates the presence of a potential protection mechanism against lipid  
273 peroxidation. Compared to *Aldh2* and *Aldh3a1*, *Aldh1a1* is the most important enzyme to oxidize  
274 aldehydes formed by lipid peroxidation in murine hepatocytes (Makia, Bojang et al. 2011). The  
275 higher susceptibility to lipid peroxidation and the associated oxidative stress in beavers may exert  
276 selective pressure for increased expression of *Aldh1a1*. Gene duplication is one way to increase  
277 gene dosage rapidly. From this point of view, *Aldh1a1* duplication in beaver is very likely a result of  
278 natural selection, which significantly improves its tolerance against oxidative stress, and so  
279 contributes to its longevity. In addition to gene duplication, our data also showed different  
280 expression patterns of the copies across tissues (**Figure 2E**), which warrants future studies to  
281 explore whether diverse selections have shaped regulation of *Aldh1a1* copies. While no difference  
282 in *Aldh1a1* activity on RET was observed between beavers and mice, *Aldh1a1* in beavers showed  
283 much higher activities on MDA and HNE than that in mice.

284 Increased *Aldh1* activity is expected to increase organism's resistance to oxidative stress.  
285 Enhanced tolerance for the oxidative stress has been found in long-lived fruit flies comparing those  
286 with normal lifespan (Deepashree, Niveditha et al. 2019). In human, centenarians have been found  
287 with less oxidative stress damages comparing to controls (Belenguer-Varea, Tarazona-  
288 Santabalbina et al. 2019). Linked to multiple age-related diseases, the oxidative stress is likely one  
289 of major contributors to aging (Liguori, Russo et al. 2018). Lipoxidation increases with age (Mitchell,  
290 Buffenstein et al. 2007), while reactive aldehyde, a known carcinogen, interferes with DNA  
291 replication, causes DNA damage, and induces formation of DNA adducts (Langevin, Crossan et al.  
292 2011). *Aldh1a1* duplication can increase cellular protection against these toxins. Our finding of  
293 better toleration of ethanol by beaver cells is consistent with a previous human study, which showed  
294 low *Aldh1a1* activity might account for alcohol sensitivity in some Caucasian populations (Marchitti,  
295 Bocker et al. 2008). Stem cell exhaustion is one of hallmarks of the aging process. *Aldh1a1* is also  
296 a marker gene associated with stemness of cells and expressed higher in stem cells (Li, Condello  
297 et al. 2017). *Aldh1a1* duplication may also contribute to stem cell maintenance in beavers. This  
298 hypothesis is consistent with results from other studies, which found unsaturated fatty acids can

299 maintain cancer cell stemness (Mukherjee, Kenny et al. 2017) and positive association between  
300 *Aldh1a1* expression and lipid unsaturation level (Li, Condello et al. 2017). Thus, *Aldh1a1*  
301 duplication may affect beavers' aging process by increasing both resilience to oxidative stress and  
302 the stemness of beaver cells. Mice deficient in both *Aldh1a1* and *Aldh3a1* had fewer hematopoietic  
303 stem cells, more reactive oxygen species, and increased sensitivity to DNA damage (Gasparetto,  
304 Sekulovic et al. 2012), all of which are early aging phenotypes.

305 Several studies have shown the association of *Aldh1a1* expression with the aging process. The  
306 expression of *Aldh1a1* dramatically increases with age in mouse hematopoietic stem cells (Levi,  
307 Yilmaz et al. 2009). It is significantly lower in CD4<sup>+</sup> T cells from aged mice than those from young  
308 mice, and its low expression may affect migration of T cells in aged mice (Park, Miyakawa et al.  
309 2014). However, how and in which tissues the expression of *Aldh1a1* is significantly changed with  
310 age is not clear. To explore this, we used human gene expression data in diverse tissues from  
311 GTEx (Carithers, Ardlie et al. 2015) and studied *Aldh1a1* expression pattern during aging in the  
312 presence of several potential covariates (see **Methods**). In several tissues, the expression of  
313 *Aldh1a1* significantly changes with age (FDR < 0.01) (**Figure 7**). For example, it significantly  
314 increases with age in adipose tissue ( $r = 0.17$ , FDR = 0.0003), which may be associated with an  
315 increase in the percentage of body fat among the old (St-Onge and Gallagher 2010). It also  
316 significantly decreases with age in several human brain regions. This may be associated with an  
317 increase in some brain disorders among the old, as patients with Parkinson's disease tend to have  
318 a decreased expression of *Aldh1a1* in corresponding brain regions (Galter, Buervenich et al. 2003).  
319 It is believed that ALDHs play a significant role in neuroprotection (Marchitti, Deitrich et al. 2007).  
320 For example, ALDH1A1 has been found as a marker of astrocytic differentiation during brain  
321 development (Adam, Schnell et al. 2012). Thus, *Aldh1a1* duplication may also protect beaver from  
322 age-related brain impairment.

323 Compared to other mammals, the adipose tissue and muscles of beavers show different lipid  
324 composition, with the highest proportion of PUFAs (Martysiak-Zurowska, Zalewski et al. 2009,  
325 Zalewski, Martysiak-Zurowska et al. 2009, Domaradzki, Florek et al. 2019), which may indicate an  
326 unusual way of lipid metabolism and anti-lipoxidation in beavers. Consistent with the unusual lipid  
327 composition in beavers, we found genes differentially expressed between mice and beavers are  
328 most enriched in lipid metabolism (**Figure 6**). Besides, several genes expanded in the beaver  
329 genome, including *Aldh1a1*, *Hpgd*, *Fitm1*, *Cyp19a1*, and *Pla2g4c*, are also associated with lipid  
330 metabolism. *Aldh1a1* knockout mice show decreased accumulation of both subcutaneous and  
331 visceral fat pads (Ziouzenkova, Orasanu et al. 2007), indicating that *Aldh1a1* duplication may  
332 contribute to accumulation of protective layers of fat which beavers evolved to provide insulation in  
333 cold water. Furthermore, *Fabp3*, one of the top positively selected genes in beaver, has also been

334 found to be associated with intramuscular fat deposition and body weight in chicken (Ye, Chen et  
335 al. 2010) and pigs (Gerbens, van Erp et al. 1999). In mice, *Fabp3* is essential for fatty acid oxidation  
336 in brown adipose tissue and plays a central role in cold tolerance (Vergnes, Chin et al. 2011).

337 Among genes duplicated specifically in beavers, *Hpgd* is highly expressed in regulatory T cells,  
338 which prevents autoimmunity and maintains adipose tissue homeostasis (Schmidleithner, Thabet  
339 et al. 2019). *Fitm1* plays an important role in lipid droplet accumulation. *Cyp19a1* is involved in the  
340 synthesis of cholesterol, steroids, and other lipids. It also catalyzes estrogen biosynthesis, which  
341 enhances healthy aging and human longevity (Horstman, Dillon et al. 2012). A significant  
342 association between *Cyp19a1* polymorphisms and longevity was observed in humans (Corbo,  
343 Ulizzi et al. 2011). As a member of the phospholipase A2 enzyme family, *Pla2g4c* plays a role in  
344 hydrolyzing glycerol-phospholipids to produce lysophospholipids and free fatty acids. Although not  
345 enriched on the pathway level, among the top 10 putative positive selection genes, three are  
346 associated with lipid metabolism. *Erlin2* is a regulator of cytosolic lipid of cancer cells (Wang, Zhang  
347 et al. 2012). *Fabp3* plays a role in metabolism and transport of long chain polyunsaturated fatty  
348 acid, and its role in lipid regulation may be important for mitochondrial function (Pollard, Ingram et  
349 al. 2019). Genetic variant association studies indicate *Cilp2* regulates lipid species in both mice  
350 and humans (Jha, McDevitt et al. 2018). All these genetic and phenotypic features indicate a natural  
351 selection on lipid metabolism in beavers. Genes involved in lipid composition have been found  
352 under stronger selective pressure in long-lived species (Jobson, Nabholz et al. 2010). The evolution  
353 of lipid metabolism is connected to mammalian longevity (Li and de Magalhaes 2013), and the  
354 important role of lipid metabolism in aging and lifespan regulation have been observed in different  
355 species, including humans (Johnson and Stolzing 2019). We hypothesize that altered regulation of  
356 genes associated with lipid metabolism in the beaver genome likely contributes to its longevity.  
357 Although how altered lipid metabolism affects beavers' longevity needs further exploration, several  
358 unusual fatty acids, such as branched-chain (BCFA) and odd-chain (OCFA), which are typical for  
359 ruminants, were detected in beaver muscles. BCFA and OCFA have shown positive biological  
360 effects on anti-cancer activity (Domaradzki, Florek et al. 2019).

361 Like other long-lived rodent species, beavers are also cancer resistant. The malignant  
362 transformation of beaver cells needs both inactivation of Tp53, Rb1 and Pp2ca and constitutive  
363 activation of telomerase and HRas (Seluanov, Gladyshev et al. 2018). Such requirements for  
364 beaver cells are more stringent than for mouse cells and identical to those for human cells, which  
365 makes beavers a promising model to study human cancer. Several findings from this study may  
366 shed some light on the cancer resistance of beavers. *Hpgd*, a known tumor suppressor for many  
367 types of cancer, has been duplicated uniquely in beaver among rodents. The expansion of *Aldh1a1*  
368 can better protect beaver cells against lipid aldehyde, which can damage DNA and proteins, by

369 metabolizing reactive aldehyde into harmless acetic acid. Increased expression of genes in DNA  
370 repair pathway can also protect beavers from cancer.

371

## 372 **Materials and Methods**

### 373 **De novo genome assembly**

374 We generated the beaver genome assembly using the third-generation sequencing technology and  
375 a new scaffolding method. A single 'Chicago' library (sequenced at a ~87X coverage) was  
376 generated by Dovetail Genomics. Those sequence data were mapped to our initial assembly (with  
377 scaffold N50 = 55.69kb), which was generated by using AllPath-LG with default parameters on  
378 whole genome shotgun sequences from the Illumina HiSeq platform. And then HiRise scaffolding  
379 pipeline (Putnam, O'Connell et al. 2016) was used to generate the dovetail assembly (with a  
380 scaffold N50 = 20.99 Mb). Finally, we used the published long PacBio reads to fill gaps in the  
381 dovetail assembly (Lok, Paton et al. 2017).

382

### 383 **BUSCO-based genome quality assessment**

384 We used BUSCO v2(Simao, Waterhouse et al. 2015) to evaluate the completeness of the beaver  
385 genome assemblies. Briefly, BUSCO assesses the genome by searching for presence of near-  
386 universal single-copy genes from OthoDB v9(Zdobnov, Tegenfeldt et al. 2017). Absence of those  
387 conserved genes indicates incompleteness of the genome. In our analysis, we used the  
388 mammalian gene set consisting of 4,104 single-copy genes that are present in more than 90%  
389 mammalian species.

390

### 391 **Training for ab initio gene prediction**

392 Augustus was trained by running BUSCO(Simao, Waterhouse et al. 2015) with the '--long'  
393 parameter, which performs a full optimization of training for Augustus gene finding. SNAP was  
394 trained following the previously described pipeline(Campbell, Holt et al. 2014) with three iterations.

395

### 396 **Gene structure and function annotation**

397 Maker2(Holt and Yandell 2011) was used for gene structure prediction (see **Figure 1A** for the  
398 pipeline). Repeating elements were first masked by RepeatMasker (v4.07)(Tarailo-Graovac and  
399 Chen 2009), with RepBase repeat libraries (20170127)(Bao, Kojima et al. 2015) and beaver-  
400 specific repeating elements constructed by RepeatModeler (version 1.0.10) following the  
401 instruction given by

402 [http://weatherby.genetics.utah.edu/MAKER/wiki/index.php/Repeat\\_Library\\_Construction--Basic](http://weatherby.genetics.utah.edu/MAKER/wiki/index.php/Repeat_Library_Construction--Basic).

403 RepeatRunner was then used to further identified more divergent transposable protein elements  
404 provided by Maker2.

405 With the repeat-masked assembly, genes were predicted by ab initio gene predictors (i.e.,  
406 SNAP(Korf 2004) and Augustus(Stanke and Waack 2003)) and evidence-based gene calling (i.e.,  
407 using transcript assembly and protein sequences). For beaver gene transcripts, we used our  
408 16,816 assembled transcripts (see above) and the 9,805 full length open reading frames from the  
409 published beaver genome(Lok, Paton et al. 2017). For protein evidence, about 66.7 thousands of  
410 reviewed mammalian protein sequences from Swiss-Prot(The UniProt 2017) were used for  
411 homolog-based gene prediction. These transcript and protein sequences were used to train the ab  
412 initio gene predictors (see above), polish the predicted gene models, and evaluate each predicted  
413 gene model. Finally, we predicted 26,515 beaver genes with evidence support from either transcript  
414 or protein sequences.

415 For each gene, Maker2 calculates an annotation edit distance (AED) score, which measures the  
416 goodness of fit of each gene to the evidence supporting it. A genome is usually considered well  
417 annotated if more than 90% genes have AED scores < 0.5 and over 50% proteins contain a  
418 recognizable domain(Campbell, Holt et al. 2014). In our beaver genome annotation, ~90.7% gene  
419 models have AED scores lower than 0.5 (**Figure 1 – Supplement Figure S1**) and 78% of predicted  
420 gene products contain known protein domains by InterProScan (v5.25)(Jones, Binns et al. 2014).

421

#### 422 **Orthology and phylogeny analyses**

423 To identify gene families across species, we used OrthoDB (release 9)(Zdobnov, Tegenfeldt et al.  
424 2017), which covers more than 600 eukaryotic species with functional annotation from more than  
425 100 sources. In our analysis we selected 14 rodent and rabbit species from OrthoDB and mapped  
426 beaver and naked mole protein sequences to OrthoDB. We chose human and chimpanzee as out-  
427 group species. We identified ~21,000 gene families, among which 5,087 gene families have single  
428 copy across all 18 species.

429 Single-copy gene families were used for phylogenetic analysis. Briefly, orthologs from each family  
430 were first aligned by MUSLE(Edgar 2004). Poorly aligned regions was removed by TrimAl(Capella-  
431 Gutierrez, Silla-Martinez et al. 2009). Trimmed alignments were then concatenated and used to  
432 generate the phylogenetic tree by RAxML(Stamatakis 2014). The best substitution model for the  
433 full data matrix was determined by the Akaike information criterion in MrModeltest  
434 software(Nylander 2004). The best-scoring maximum likelihood (ML) tree was inferred using a  
435 novel rapid bootstrap algorithm combined with ML searches following 1000 RAxML runs (using the  
436 'f -a' option)(Stamatakis 2014). The divergence times for the species analyzed were estimated by  
437 Reltime(Tamura, Battistuzzi et al. 2012). Diverged about 46 million years ago, Ords Kangaroo rat is  
438 evolutionarily closest to beaver (**Figure 1B**).

439

#### 440 **Identification of significant gene expansion in beaver**

441 With the phylogeny that we built and the gene counts from OrthoDB (Zdobnov, Tegenfeldt et al.  
442 2017), we predicted gene family expansion using CAFE 3 (Han, Thomas et al. 2013). CAFE first  
443 calculated an error model for gene family size estimation as a part of genome assembly and  
444 annotation. For our gene counts, it estimated ~4.8% of the gene families had incorrect gene  
445 numbers assigned to them. It corrected this error before calculating ancestral family sizes and then  
446 estimated a more accurate gene family evolution rate. Finally, it calculated the probability of  
447 observing the sizes of each gene family of those species by Monte Carlo re-sampling procedure.  
448 Families with large variance in size, especially observed in closely related species, will tend to have  
449 a lower *P*-value. For families with low *P*-values (0.01 as the default), a *P*-value for the transition  
450 between parent and child nodes for each branch in the phylogeny was also calculated to identify  
451 where the large change of family size takes place.

452 We identified 84 candidate gene families showing significant expansion in the beaver branch (FDR  
453 < 0.01). To sidestep false positives due to assembly and annotation artifact, pseudogenes, etc., we  
454 first removed genes without the support of RNA-seq reads from all the tissues (**Supplement Table**  
455 **S1**) in our analysis. We also identified pseudogenes and removed ones with low expression levels  
456 (TMP < 5 across tissues). We kept pseudogenes with relatively high expression levels, since they  
457 may be functional. We then further filtered genes based on the percentage of identities between  
458 beaver gene copies. Briefly, we iteratively removed the gene copy with the least average identity  
459 to other beaver genes in the family, if the average identity is below 70%. After this procedure, we  
460 reduced our candidate expanded gene families to eight genes (**Figure 2 – Supplement Figure**  
461 **S2**).

462

#### 463 **Beaver-specific expansion of conserved genes**

464 To find beaver-specific expansion of conserved genes, we require the same number of copies in  
465 other species included in our study and a higher copy number only in the beaver genome. Initially,  
466 234 gene candidates were collected. After removing copies without RNA-seq reads support, lowly  
467 expressed pseudogenes (TPM < 5), and gene copies with low identity between gene products  
468 (identity < 0.7), 83 genes remained. We further processed them to remove potential false positives  
469 by considering only genes with the following qualifications: (1) gene predictions with good synteny  
470 in their genomic neighborhood among beaver, mouse, and human; (2) genes with differences in  
471 the coding sequences of their copies; (3) genes with variable sites in their copies supported by  
472 RNA-seq reads (from the same individual beaver). 18 beaver-specific gene expansions met these  
473 stringent criteria and were further validated by qPCR, with five of them show more copy numbers  
474 comparing to reference genes.

475

476 **Pseudogene identification**

477 GeneWise(Birney, Clamp et al. 2004) was used to identify pseudogenes (**Figure 2 – Supplement**  
478 **Figure S5**). For a predicted beaver gene, we extracted the genomic sequence from its locus with  
479 both upstream and downstream 5-kb regions. Using its mouse (or human) ortholog as the  
480 reference, we then scanned the gene sequence by GeneWise and checked the presence of  
481 frameshift indels that can 'pseudogenize' the gene. We also checked if the predicted gene can be  
482 a processed pseudogene, which can be generated through mRNA retrotransposition. If a predicted  
483 beaver gene has no introns, we checked its orthologs in other rodents to determine whether it is a  
484 processed pseudogene or a single-exon gene.

485

486 **Positive selection**

487 Branch-site likelihood method (Zhang, Nielsen et al. 2005) implemented in PosiGene (Sahm, Bens  
488 et al. 2017) was used to identify genes under positive selection in the beaver genome. Only 9,750  
489 genes with alignment of ortholog coding sequence from at least 10 species were considered. After  
490 the initial prediction by PosiGene (Sahm, Bens et al. 2017), manual checking was carried out for  
491 all ~150 candidate positive selection genes ( $P < 0.05$ ). Briefly, we removed false positives, and for  
492 genes with ambiguous signals we manually checked and improved their predicted gene structures  
493 based on protein sequence alignments of orthologs and supporting RNA-seq reads using Apollo  
494 (Lee, Helt et al. 2013). We then used the improved coding sequences as the input for PosiGene  
495 and ran the pipeline three times. Finally, we identified 21 beaver genes under positive selection  
496 with FDR  $< 0.01$  consistently in all three independent runs. The coding sequences of other species  
497 were download from NCBI as of January of 2020.

498

499 **RNA extraction and sequencing**

500 Total RNA was isolated from frozen tissues (brain and liver with two replicates each) using the  
501 mRNA-Seq Sample Prep Kit Illumina (San Diego, CA. USA) in accordance with the manufacturer's  
502 instructions, and the mRNA integrity was checked by the agarose gel analysis. Polyadenylated  
503 RNA was then isolated using a poly-dT bead procedure and followed by reverse transcription.  
504 Short-insert 'paired-end' libraries were prepared using the Illumina TruSeq Sample Preparation Kit  
505 v2, and the sequencing was performed on the Illumina HiSeq2000 platform. The raw data were  
506 processed by NGS QC Toolkit (v.2.3.3)(Patel and Jain 2012) to remove low-quality reads.

507

508 **De novo transcriptome assembly**

509 RNA-seq data from brain and liver (each with two replicates) were assembled using Trinity(Haas,  
510 Papanicolaou et al. 2013). We collected 16,816 high quality beaver transcripts, by requiring each  
511 transcript to meet the following conditions: (1) proper start and stop codons, (2) a correct reading

512 frame (codons in triplets), (3) a gene length similar to the mouse ortholog ( $\pm 20\%$ ), (4) a good  
513 alignment with the mouse ortholog (in peptide sequence), (5) the best candidate among all beaver  
514 Trinity assembled sequences.

515

#### 516 **qPCR validation**

517 Candidate primers were designed by Primer-Blast (Ye, Coulouris et al. 2012) in the exons of  
518 selected genes. Specificity of the primers was first checked by Primer-Blast against all of the coding  
519 sequences in the beaver genome. Then genome-wide specificity was checked by MFEprimer (Qu,  
520 Zhou et al. 2012). Specificity of primers was further inspected by gel electrophoresis and the  
521 melting curve analysis. Amplification efficiency was checked by a standard curve analysis for each  
522 candidate primers with different amount of DNA input to make sure that the finally used primers  
523 have equal amplification efficiency. Quantitative PCR was used to quantify gene copy number, with  
524 three replicates for each of the three different amount of DNA input. Two genes – *Hcfc1* on an  
525 autosome and *Pelo* on chromosome X – with no predicted expansion in beaver and no annotated  
526 expansion in other rodents (according to orthoDB (Zdobnov, Tegenfeldt et al. 2017)) were used as  
527 references. The copy number of each target gene relative to its corresponding reference genes  
528 was calculated by  $\Delta C_t$ . And the genomic DNA of a male beaver, different from ones whose samples  
529 were used for the genome sequencing and assembly and transcriptomics, was used for the  
530 experiment. Primers for target and reference genes are listed in **Supplement Table S2**.

531

#### 532 **Western blot**

533 Liver cytosolic extracts were quantitated using the BCA assay (Thermo). 30 ug of each extract was  
534 resolved through 4-20% Criterion Tris-Glycine (TGX) Stain-Free SDS-PAGE (Biorad) and  
535 transferred to nitrocellulose. Prior to transfer, total proteins were imaged using a Biorad Gel  
536 Documentation System to control for protein loading. Rabbit polyclonal anti-Aldh1a1 (Invitrogen  
537 cat# PA5-95937) was used as the primary to detect Aldh1a1 isoforms. Protein loading was also  
538 checked by performing Western blot using anti-beta Actin (Abcam, ab82227).

539

#### 540 **Ethanol treatment of cells**

541 The effects of ethanol on cellular functions were studied with cultured primary beaver and mouse  
542 lung fibroblasts. We used two different beaver and mouse cell lines, low PD cells stabilized in  
543 culture. Cells were seed in complete medium containing 15% FBS in 96 well plate for 24 hours,  
544 then incubated in medium containing 300 mM ethanol for seven hours. Then WST-1 assay was  
545 performed by adding WST-1 reagent (cell proliferation reagent, Roche) directly to the culture wells,  
546 incubating for 4h at 37°C and 5% CO<sub>2</sub>, shaking thoroughly for 1 min on a shaker and then measuring  
547 the absorbance at 430-480 nm with TECAN spark 20M spectrophotometric reader. The stable



548 tetrazolium salt WST-1 was cleaved to a soluble formazan by a complex cellular mechanism that  
549 occurs primarily at the cell surface. This bio-reduction is largely dependent on the glycolytic  
550 production of NAD(P)H in viable cells. Therefore, the amount of formazan dye formed directly  
551 correlates to the number of metabolically active cells in the culture.

552 To examine whether beaver and mouse lung fibroblast cells show significantly different rate of cell  
553 death under the ethanol treatment, relative to corresponding controls, a linear mixed effects model  
554 was used with species as the fixed effect and individuals ( $n=4$  for each species with 3 replicates  
555 each individual) as random effects (  $\text{lmer}(\text{cell death rate} \sim \text{Species} + (1|\text{individual}))$  ), which is  
556 implemented in the R package lme4 (Bates, Mächler et al. 2015).

557

### 558 **Liver aldehyde dehydrogenase activity**

559 In addition to the cytosolic *Aldh1a1*, a mitochondrial enzyme, *Aldh2*, also plays an important role in  
560 the aldehyde metabolism. A previous study had shown that in murine liver *Aldh1a1* plays a more  
561 important role in the metabolism of endogenous aldehydes than *Aldh2* (Makia, Bojang et al. 2011).  
562 To exclude influence from *Aldh2*, we tested aldehyde dehydrogenase activity using cytosolic  
563 protein extracts from liver cells. Crude cytosolic protein extracts were prepared from wild beaver or  
564 mouse (C57/Bl6) livers using phosphate buffer similar to a previously described method (Makia,  
565 Bojang et al. 2011). Specifically, tissue was resuspended in K-Phos Buffer (50 mM potassium  
566 phosphate pH7.4, 250 mM sucrose, 1 mM EDTA) at 1g/3.0ml. Tissues were dounce homogenized  
567 in ice using a Teflon pestle followed by ten passages through a 27Ga needle to lyse the cells.  
568 Samples were centrifuged (Thermo/Sorvall Legend Micro21R) at 1000 rpm (100x g) for 10 minutes  
569 at 4°C to remove any remaining intact cells. Supernatant was transferred to a clean tube and  
570 centrifuged at 14, 000 rpm (18,800x g) for 20 minutes at 4°C. We found that the  
571 supernatants/extracts prepared this way and rapidly aliquotted and frozen with liquid nitrogen did  
572 not lose significant activity after one freeze/thaw cycle. Just prior to assaying, a 100 µl aliquot of  
573 the supernatant was thawed on ice and passaged through a 0.5 ml Zeba desalting spin column  
574 (Thermo; 7,000 mwco) equilibrated in the same K-Phos buffer to remove small molecules that might  
575 compete with added substrates. Aldehyde dehydrogenase was measured in 384-well transparent  
576 microplates in 50 µl volume consisting of 10 µl extract in the same K-Phos buffer supplemented  
577 with 1mM NAD<sup>+</sup>. Aldehyde substrates all-trans-retinal (RET), malonaldehyde tetrabutylammonium  
578 salt (MAD), and 4-hydroxynonenal (NHE) were added at indicated concentrations from DMSO  
579 stocks. Final DMSO in assay was 4%. Dehydrogenase activity was measured as the change in  
580 absorbance at 340 nm (reduction of NAD<sup>+</sup> to NADH) using a Tecan Spark 20M plate reader pre-  
581 equilibrated at 37°C. Rates were determined after a few minutes of lag during which time the plate  
582 temperature was adjusting to 37°C. NAD<sup>+</sup>, all-trans-retinal, and malonaldehyde  
583 tetrabutylammonium salt, were purchased from Sigma. 4-hydroxynonenal was purchased from

584 Cayman Chemical. Aldh1a1-class of specific activity was determined by subtracting any trace  
585 amount of NAD<sup>+</sup> to NADH conversion that occurred in the absence of added aldehyde substrate.

### 586 **Gene expression comparison between beavers and mice**

587 For our transcriptomic analysis, we used beaver samples from two young male adults and RNA-  
588 seq data from 6 weeks old young adult mice (Li, Qing et al. 2017). The RNA-Seq data of mice were  
589 generated from eight individuals (4 females and 4 males) for both liver and brain. Although our  
590 beaver samples were from two males, we included both male and female mice to increase the  
591 detection power with sex as a factor in the model for differential gene expression analysis. Principle  
592 component analysis showed good separation between beaver and mouse samples (**Figure 6 –**  
593 **Supplement Figure S14**). We only considered protein coding genes and used Kallisto (Bray,  
594 Pimentel et al. 2016) to estimate gene expression levels, which showed better performance for  
595 genes with paralogs.

596 The detection of differential expressed genes between species is much more complicated than  
597 analysis within species. Because several differences between two genomes – e.g., different gene  
598 annotation quality, different number of genes, and different lengths of same genes between species  
599 – can lead to biased results, we used the following strategies together in our analysis. (1) For gene  
600 annotation quality control, we only considered 16,303 beaver genes that show high protein  
601 sequence similarity with their corresponding orthologs from other rodent species (including mouse)  
602 and could be successfully clustered into gene families by OthorDB (Zdobnov, Tegenfeldt et al.  
603 2017). (2) We further restricted our analysis to genes (12,089) that share one-to-one orthology  
604 between beaver and mouse. (3) We also controlled gene length. We used tximport (Soneson, Love  
605 et al. 2015) to obtain family-level gene expression and weighted gene lengths for each gene family.  
606 Together with estimated read counts, the weighted gene lengths were also provided to DESeq2  
607 (Love, Huber et al. 2014), and differences in gene lengths among samples were considered for  
608 differential expression analysis.

609

### 610 **ALDH1A1 expression during human aging**

611 Using data from the GTEx Project (phs000424.GTEx.v7.p2.c1) (Carithers, Ardlie et al. 2015), we  
612 studied gene expression changes of ALDH1A1 during aging. In the GTEx Project, many samples  
613 were taken from post-mortem individuals. Studies have demonstrated that expression of some  
614 genes may change in certain tissues after death and show significant association with post-mortem  
615 interval (PMI, in minutes between death and sample collection) (Ferreira, Munoz-Aguirre et al.  
616 2018). To reduce artifacts from PMIs, we ignored tissues where the expression of ALDH1A1 shows  
617 significant association with PMI ( $P < 0.01$ ). For the remaining tissues, we used liner regression to

618 assess the association between gene expression and age with sex, body mass index, and PMI as  
619 covariates.

620

### 621 **Data Analyses and Availability**

622 Genome DNA sequence data were submitted to BioProject database  
623 (<https://www.ncbi.nlm.nih.gov/bioproject/>) with accession numbers PRJNA505050. Genome  
624 assembly was submitted to the NCBI Assembly database (<https://www.ncbi.nlm.nih.gov/assembly/>)  
625 with accession number RPDE00000000. RNA-Seq data of liver and brain tissue of two beaver  
626 individuals were submitted to NCBI with accession number PRJNA627298, which will be released  
627 once the manuscript is accepted.

628

### 629 **Acknowledgments**

630 This work was supported by NIH grant P01AG047200 to V.G., A.S., V.N.G., J.V., and Z.D.Z.

631

### 632 **Additional files**

633 *Supplementary file 1.* Coding sequences and protein sequences alignments with selection signals  
634 of beaver genes under positive selection (FDR<0.01).

635

### 636 **References**

- 637 Abegglen, L. M., A. F. Caulin, A. Chan, K. Lee, R. Robinson, M. S. Campbell, W. K. Kiso, D. L. Schmitt,  
638 P. J. Waddell, S. Bhaskara, S. T. Jensen, C. C. Maley and J. D. Schiffman (2015). "Potential  
639 Mechanisms for Cancer Resistance in Elephants and Comparative Cellular Response to DNA  
640 Damage in Humans." *JAMA* **314**(17): 1850-1860.
- 641 Adam, S. A., O. Schnell, J. Poschl, S. Eigenbrod, H. A. Kretzschmar, J. C. Tonn and U. Schuller (2012).  
642 "ALDH1A1 is a marker of astrocytic differentiation during brain development and correlates with  
643 better survival in glioblastoma patients." *Brain Pathol* **22**(6): 788-797.
- 644 Adzhubei, I., D. M. Jordan and S. R. Sunyaev (2013). "Predicting functional effect of human  
645 missense mutations using PolyPhen-2." *Curr Protoc Hum Genet* **Chapter 7**: Unit7 20.
- 646 Ashur-Fabian, O., A. Avivi, L. Trakhtenbrot, K. Adamsky, M. Cohen, G. Kajakaro, A. Joel, N.  
647 Amariglio, E. Nevo and G. Rechavi (2004). "Evolution of p53 in hypoxia-stressed Spalax mimics  
648 human tumor mutation." *Proc Natl Acad Sci U S A* **101**(33): 12236-12241.
- 649 Ayala, A., M. F. Munoz and S. Arguelles (2014). "Lipid peroxidation: production, metabolism, and  
650 signaling mechanisms of malondialdehyde and 4-hydroxy-2-nonenal." *Oxid Med Cell Longev*  
651 **2014**: 360438.
- 652 Bao, W., K. K. Kojima and O. Kohany (2015). "Rebase Update, a database of repetitive elements  
653 in eukaryotic genomes." *Mob DNA* **6**: 11.
- 654 Bates, D., M. Mächler, B. Bolker and S. Walker (2015). "Fitting Linear Mixed-Effects Models Using  
655 lme4." *2015* **67**(1): 48.

- 656 Belenguer-Varea, A., F. J. Tarazona-Santabalbina, J. A. Avellana-Zaragoza, M. Martinez-Reig, C.  
657 Mas-Bargues and M. Ingles (2019). "Oxidative stress and exceptional human longevity: Systematic  
658 review." Free Radic Biol Med.
- 659 Birney, E., M. Clamp and R. Durbin (2004). "GeneWise and Genomewise." Genome Res **14**(5): 988-  
660 995.
- 661 Bray, N. L., H. Pimentel, P. Melsted and L. Pachter (2016). "Near-optimal probabilistic RNA-seq  
662 quantification." Nat Biotechnol **34**(5): 525-527.
- 663 Campbell, M. S., C. Holt, B. Moore and M. Yandell (2014). "Genome Annotation and Curation Using  
664 MAKER and MAKER-P." Curr Protoc Bioinformatics **48**: 4 11 11-39.
- 665 Capella-Gutierrez, S., J. M. Silla-Martinez and T. Gabaldon (2009). "trimAl: a tool for automated  
666 alignment trimming in large-scale phylogenetic analyses." Bioinformatics **25**(15): 1972-1973.
- 667 Carithers, L. J., K. Ardlie, M. Barcus, P. A. Branton, A. Britton, S. A. Buia, C. C. Compton, D. S.  
668 DeLuca, J. Peter-Demchok, E. T. Gelfand, P. Guan, G. E. Korzeniewski, N. C. Lockhart, C. A. Rabiner,  
669 A. K. Rao, K. L. Robinson, N. V. Roche, S. J. Sawyer, A. V. Segre, C. E. Shive, A. M. Smith, L. H. Sobin,  
670 A. H. Undale, K. M. Valentino, J. Vaught, T. R. Young, H. M. Moore and G. T. Consortium (2015).  
671 "A Novel Approach to High-Quality Postmortem Tissue Procurement: The GTEx Project." 672  
Biopreserv Biobank **13**(5): 311-319.
- 673 Carpenter, J. and C. J. Marion (2013). Exotic Animal Formulary. St. Louis, Missouri, USA, Elsevier  
674 Saunders.
- 675 Choi, Y. and A. P. Chan (2015). "PROVEAN web server: a tool to predict the functional effect of  
676 amino acid substitutions and indels." Bioinformatics **31**(16): 2745-2747.
- 677 Corbo, R. M., L. Ulizzi, L. Positano and R. Scacchi (2011). "Association of CYP19 and ESR1  
678 pleiotropic genes with human longevity." J Gerontol A Biol Sci Med Sci **66**(1): 51-55.
- 679 Deepashree, S., S. Niveditha, T. Shivanandappa and S. R. Ramesh (2019). "Oxidative stress  
680 resistance as a factor in aging: evidence from an extended longevity phenotype of *Drosophila*  
681 *melanogaster*." Biogerontology **20**(4): 497-513.
- 682 Ding, Y., M. Tong, S. Liu, J. A. Moscow and H. H. Tai (2005). "NAD<sup>+</sup>-linked 15-hydroxyprostaglandin  
683 dehydrogenase (15-PGDH) behaves as a tumor suppressor in lung cancer." Carcinogenesis **26**(1):  
684 65-72.
- 685 Domaradzki, P., M. Florek, P. Skalecki, A. Litwhiczuk, M. Kedzierska-Matysek, A. Wolanciuk and K.  
686 Tajchman (2019). "Fatty acid composition, cholesterol content and lipid oxidation indices of  
687 intramuscular fat from skeletal muscles of beaver (*Castor fiber* L.)." Meat Science **150**: 131-140.
- 688 Doni, A., M. Stravalaci, A. Inforzato, E. Magrini, A. Mantovani, C. Garlanda and B. Bottazzi (2019).  
689 "The Long Pentraxin PTX3 as a Link Between Innate Immunity, Tissue Remodeling, and Cancer." 690  
Front Immunol **10**: 712.
- 691 Edgar, R. C. (2004). "MUSCLE: multiple sequence alignment with high accuracy and high  
692 throughput." Nucleic Acids Res **32**(5): 1792-1797.
- 693 Fang, X., I. Seim, Z. Huang, M. V. Gerashchenko, Z. Xiong, A. A. Turanov, Y. Zhu, A. V. Lobanov, D.  
694 Fan, S. H. Yim, X. Yao, S. Ma, L. Yang, S. G. Lee, E. B. Kim, R. T. Bronson, R. Sumbera, R. Buffenstein,  
695 X. Zhou, A. Krogh, T. J. Park, G. Zhang, J. Wang and V. N. Gladyshev (2014). "Adaptations to a  
696 subterranean environment and longevity revealed by the analysis of mole rat genomes." Cell Rep  
697 **8**(5): 1354-1364.
- 698 Ferreira, P. G., M. Munoz-Aguirre, F. Reverter, C. P. Sa Godinho, A. Sousa, A. Amadoz, R. Sodaei,  
699 M. R. Hidalgo, D. Pervouchine, J. Carbonell-Caballero, R. Nurtdinov, A. Breschi, R. Amador, P.  
700 Oliveira, C. Cubuk, J. Curado, F. Aguet, C. Oliveira, J. Dopazo, M. Sammeth, K. G. Ardlie and R.

701 Guigo (2018). "The effects of death and post-mortem cold ischemia on human tissue  
702 transcriptomes." *Nat Commun* **9**(1): 490.

703 Galter, D., S. Buervenich, A. Carmine, M. Anvret and L. Olson (2003). "ALDH1 mRNA: presence in  
704 human dopamine neurons and decreases in substantia nigra in Parkinson's disease and in the  
705 ventral tegmental area in schizophrenia." *Neurobiol Dis* **14**(3): 637-647.

706 Garaycochea, J. I., G. P. Crossan, F. Langevin, L. Mulderrig, S. Louzada, F. Yang, G. Guilbaud, N.  
707 Park, S. Roerink, S. Nik-Zainal, M. R. Stratton and K. J. Patel (2018). "Alcohol and endogenous  
708 aldehydes damage chromosomes and mutate stem cells." *Nature* **553**(7687): 171-177.

709 Gasparetto, M., S. Sekulovic, C. Brocker, P. Tang, A. Zakaryan, P. Xiang, F. Kuchenbauer, M. Wen,  
710 K. Kasaian, M. F. Witty, P. Rosten, Y. Chen, S. Imren, G. Duester, D. C. Thompson, R. K. Humphries,  
711 V. Vasiliou and C. Smith (2012). "Aldehyde dehydrogenases are regulators of hematopoietic stem  
712 cell numbers and B-cell development." *Exp Hematol* **40**(4): 318-329 e312.

713 Gerbens, F., A. J. van Erp, F. L. Harders, F. J. Verburg, T. H. Meuwissen, J. H. Veerkamp and M. F.  
714 te Pas (1999). "Effect of genetic variants of the heart fatty acid-binding protein gene on  
715 intramuscular fat and performance traits in pigs." *J Anim Sci* **77**(4): 846-852.

716 Grieb, B. C., K. Boyd, R. Mitra and C. M. Eischen (2016). "Haploinsufficiency of the Myc regulator  
717 Mtbp extends survival and delays tumor development in aging mice." *Aging (Albany NY)* **8**(10):  
718 2590-2602.

719 Haas, B. J., A. Papanicolaou, M. Yassour, M. Grabherr, P. D. Blood, J. Bowden, M. B. Couger, D.  
720 Eccles, B. Li, M. Lieber, M. D. Macmanes, M. Ott, J. Orvis, N. Pochet, F. Strozzi, N. Weeks, R.  
721 Westerman, T. William, C. N. Dewey, R. Henschel, R. D. Leduc, N. Friedman and A. Regev (2013).  
722 "De novo transcript sequence reconstruction from RNA-seq using the Trinity platform for  
723 reference generation and analysis." *Nat Protoc* **8**(8): 1494-1512.

724 Han, M. V., G. W. C. Thomas, J. Lugo-Martinez and M. W. Hahn (2013). "Estimating Gene Gain and  
725 Loss Rates in the Presence of Error in Genome Assembly and Annotation Using CAFE 3." *Molecular*  
726 *Biology and Evolution* **30**(8): 1987-1997.

727 Hofmann, J. W., X. Zhao, M. De Cecco, A. L. Peterson, L. Pagliaroli, J. Manivannan, G. B. Hubbard,  
728 Y. Ikeno, Y. Zhang, B. Feng, X. Li, T. Serre, W. Qi, H. Van Remmen, R. A. Miller, K. G. Bath, R. de  
729 Cabo, H. Xu, N. Neretti and J. M. Sedivy (2015). "Reduced expression of MYC increases longevity  
730 and enhances healthspan." *Cell* **160**(3): 477-488.

731 Holt, C. and M. Yandell (2011). "MAKER2: an annotation pipeline and genome-database  
732 management tool for second-generation genome projects." *BMC Bioinformatics* **12**: 491.

733 Horstman, A. M., E. L. Dillon, R. J. Urban and M. Sheffield-Moore (2012). "The role of androgens  
734 and estrogens on healthy aging and longevity." *J Gerontol A Biol Sci Med Sci* **67**(11): 1140-1152.

735 Houtkooper, R. H., L. Mouchiroud, D. Ryu, N. Moullan, E. Katsyuba, G. Knott, R. W. Williams and  
736 J. Auwerx (2013). "Mitonuclear protein imbalance as a conserved longevity mechanism." *Nature*  
737 **497**(7450): 451-457.

738 Hulbert, A. J., M. A. Kelly and S. K. Abbott (2014). "Polyunsaturated fats, membrane lipids and  
739 animal longevity." *J Comp Physiol B* **184**(2): 149-166.

740 Jha, P., M. T. McDevitt, R. Gupta, P. M. Quiros, E. G. Williams, K. Gariani, M. B. Sleiman, L. Diserens,  
741 A. Jochem, A. Ulbrich, J. J. Coon, J. Auwerx and D. J. Pagliarini (2018). "Systems Analyses Reveal  
742 Physiological Roles and Genetic Regulators of Liver Lipid Species." *Cell Syst* **6**(6): 722-733 e726.

743 Jobson, R. W., B. Nabholz and N. Galtier (2010). "An evolutionary genome scan for longevity-  
744 related natural selection in mammals." *Mol Biol Evol* **27**(4): 840-847.

745 Johnson, A. A. and A. Stolzing (2019). "The role of lipid metabolism in aging, lifespan regulation,  
746 and age-related disease." *Aging Cell* **18**(6): e13048.

747 Jones, P., D. Binns, H. Y. Chang, M. Fraser, W. Li, C. McAnulla, H. McWilliam, J. Maslen, A. Mitchell,  
748 G. Nuka, S. Pesseat, A. F. Quinn, A. Sangrador-Vegas, M. Scheremetjew, S. Y. Yong, R. Lopez and  
749 S. Hunter (2014). "InterProScan 5: genome-scale protein function classification." *Bioinformatics*  
750 **30**(9): 1236-1240.

751 Karczewski, K. J., L. C. Francioli, G. Tiao, B. B. Cummings, J. Alföldi, Q. Wang, R. L. Collins, K. M.  
752 Laricchia, A. Ganna, D. P. Birnbaum, L. D. Gauthier, H. Brand, M. Solomonson, N. A. Watts, D.  
753 Rhodes, M. Singer-Berk, E. M. England, E. G. Seaby, J. A. Kosmicki, R. K. Walters, K. Tashman, Y.  
754 Farjoun, E. Banks, T. Poterba, A. Wang, C. Seed, N. Whiffin, J. X. Chong, K. E. Samocha, E. Pierce-  
755 Hoffman, Z. Zappala, A. H. O'Donnell-Luria, E. V. Minikel, B. Weisburd, M. Lek, J. S. Ware, C. Vittal,  
756 I. M. Armean, L. Bergelson, K. Cibulskis, K. M. Connolly, M. Covarrubias, S. Donnelly, S. Ferriera, S.  
757 Gabriel, J. Gentry, N. Gupta, T. Jeandet, D. Kaplan, C. Llanwarne, R. Munshi, S. Novod, N. Petrillo,  
758 D. Roazen, V. Ruano-Rubio, A. Saltzman, M. Schleicher, J. Soto, K. Tibbetts, C. Tolonen, G. Wade,  
759 M. E. Talkowski, B. M. Neale, M. J. Daly and D. G. MacArthur (2019). "Variation across 141,456  
760 human exomes and genomes reveals the spectrum of loss-of-function intolerance across human  
761 protein-coding genes." *bioRxiv*: 531210.

762 Keane, M., J. Semeiks, A. E. Webb, Y. I. Li, V. Quesada, T. Craig, L. B. Madsen, S. van Dam, D.  
763 Brawand, P. I. Marques, P. Michalak, L. Kang, J. Bhak, H. S. Yim, N. V. Grishin, N. H. Nielsen, M. P.  
764 Heide-Jorgensen, E. M. Oziolor, C. W. Matson, G. M. Church, G. W. Stuart, J. C. Patton, J. C. George,  
765 R. Suydam, K. Larsen, C. Lopez-Otin, M. J. O'Connell, J. W. Bickham, B. Thomsen and J. P. de  
766 Magalhaes (2015). "Insights into the evolution of longevity from the bowhead whale genome."  
767 *Cell Rep* **10**(1): 112-122.

768 Kim, E. B., X. Fang, A. A. Fushan, Z. Huang, A. V. Lobanov, L. Han, S. M. Marino, X. Sun, A. A.  
769 Turanov, P. Yang, S. H. Yim, X. Zhao, M. V. Kasaikina, N. Stoletzki, C. Peng, P. Polak, Z. Xiong, A.  
770 Kiezun, Y. Zhu, Y. Chen, G. V. Kryukov, Q. Zhang, L. Peshkin, L. Yang, R. T. Bronson, R. Buffenstein,  
771 B. Wang, C. Han, Q. Li, L. Chen, W. Zhao, S. R. Sunyaev, T. J. Park, G. Zhang, J. Wang and V. N.  
772 Gladyshev (2011). "Genome sequencing reveals insights into physiology and longevity of the  
773 naked mole rat." *Nature* **479**(7372): 223-227.

774 Korf, I. (2004). "Gene finding in novel genomes." *BMC Bioinformatics* **5**: 59.

775 Langevin, F., G. P. Crossan, I. V. Rosado, M. J. Arends and K. J. Patel (2011). "Fancd2 counteracts  
776 the toxic effects of naturally produced aldehydes in mice." *Nature* **475**(7354): 53-58.

777 Lee, E., G. A. Helt, J. T. Reese, M. C. Munoz-Torres, C. P. Childers, R. M. Buels, L. Stein, I. H. Holmes,  
778 C. G. Elisk and S. E. Lewis (2013). "Web Apollo: a web-based genomic annotation editing platform."  
779 *Genome Biol* **14**(8): R93.

780 Levi, B. P., O. H. Yilmaz, G. Duyster and S. J. Morrison (2009). "Aldehyde dehydrogenase 1a1 is  
781 dispensable for stem cell function in the mouse hematopoietic and nervous systems." *Blood*  
782 **113**(8): 1670-1680.

783 Li, B., T. Qing, J. Zhu, Z. Wen, Y. Yu, R. Fukumura, Y. Zheng, Y. Gondo and L. Shi (2017). "A  
784 Comprehensive Mouse Transcriptomic BodyMap across 17 Tissues by RNA-seq." *Sci Rep* **7**(1):  
785 4200.

786 Li, J., S. Condello, J. Thomes-Pepin, X. Ma, Y. Xia, T. D. Hurley, D. Matei and J. X. Cheng (2017).  
787 "Lipid Desaturation Is a Metabolic Marker and Therapeutic Target of Ovarian Cancer Stem Cells."  
788 *Cell Stem Cell* **20**(3): 303-314 e305.

789 Li, Y. and J. P. de Magalhaes (2013). "Accelerated protein evolution analysis reveals genes and  
790 pathways associated with the evolution of mammalian longevity." *Age (Dordr)* **35**(2): 301-314.

791 Liberzon, A., C. Birger, H. Thorvaldsdottir, M. Ghandi, J. P. Mesirov and P. Tamayo (2015). "The  
792 Molecular Signatures Database (MSigDB) hallmark gene set collection." *Cell Syst* **1**(6): 417-425.

793 Liguori, I., G. Russo, F. Curcio, G. Bulli, L. Aran, D. Della-Morte, G. Gargiulo, G. Testa, F. Cacciatore,  
794 D. Bonaduce and P. Abete (2018). "Oxidative stress, aging, and diseases." Clin Interv Aging **13**:  
795 757-772.

796 Lok, S., T. A. Paton, Z. Wang, G. Kaur, S. Walker, R. K. Yuen, W. W. Sung, J. Whitney, J. A. Buchanan,  
797 B. Trost, N. Singh, B. Apresto, N. Chen, M. Coole, T. J. Dawson, K. Ho, Z. Hu, S. Pullenayegum, K.  
798 Samler, A. Shipstone, F. Tsoi, T. Wang, S. L. Pereira, P. Rostami, C. A. Ryan, A. H. Tong, K. Ng, Y.  
799 Sundaravadanam, J. T. Simpson, B. K. Lim, M. D. Engstrom, C. J. Dutton, K. C. Kerr, M. Franke, W.  
800 Rapley, R. F. Wintle and S. W. Scherer (2017). "De Novo Genome and Transcriptome Assembly of  
801 the Canadian Beaver (*Castor canadensis*)." G3 (Bethesda) **7**(2): 755-773.

802 Love, M. I., W. Huber and S. Anders (2014). "Moderated estimation of fold change and dispersion  
803 for RNA-seq data with DESeq2." Genome Biol **15**(12): 550.

804 Lu, D., C. Han and T. Wu (2014). "15-PGDH inhibits hepatocellular carcinoma growth through 15-  
805 keto-PGE2/PPARgamma-mediated activation of p21WAF1/Cip1." Oncogene **33**(9): 1101-1112.

806 Ma, S. and V. N. Gladyshev (2017). "Molecular signatures of longevity: Insights from cross-species  
807 comparative studies." Semin Cell Dev Biol.

808 MacRae, S. L., M. M. Croken, R. B. Calder, A. Aliper, B. Milholland, R. R. White, A. Zhavoronkov, V.  
809 N. Gladyshev, A. Seluanov, V. Gorbunova, Z. D. Zhang and J. Vijg (2015). "DNA repair in species  
810 with extreme lifespan differences." Aging (Albany NY) **7**(12): 1171-1184.

811 Makia, N. L., P. Bojang, K. C. Falkner, D. J. Conklin and R. A. Prough (2011). "Murine hepatic  
812 aldehyde dehydrogenase 1a1 is a major contributor to oxidation of aldehydes formed by lipid  
813 peroxidation." Chem Biol Interact **191**(1-3): 278-287.

814 Marchitti, S. A., C. Brocker, D. Stagos and V. Vasiliou (2008). "Non-P450 aldehyde oxidizing  
815 enzymes: the aldehyde dehydrogenase superfamily." Expert Opin Drug Metab Toxicol **4**(6): 697-  
816 720.

817 Marchitti, S. A., R. A. Deitrich and V. Vasiliou (2007). "Neurotoxicity and metabolism of the  
818 catecholamine-derived 3,4-dihydroxyphenylacetaldehyde and 3,4-  
819 dihydroxyphenylglycolaldehyde: the role of aldehyde dehydrogenase." Pharmacol Rev **59**(2): 125-  
820 150.

821 Martysiak-Zurowska, D., K. Zalewski and R. Kamieniarz (2009). "Unusual odd-chain and trans-  
822 octadecenoic fatty acids in tissues of feral European beaver (*Castor fiber*), Eurasian badger  
823 (*Meles meles*) and raccoon dog (*Nyctereutes procyonoides*)." Comp Biochem Physiol B Biochem  
824 Mol Biol **153**(2): 145-148.

825 Mitchell, T. W., R. Buffenstein and A. J. Hulbert (2007). "Membrane phospholipid composition  
826 may contribute to exceptional longevity of the naked mole-rat (*Heterocephalus glaber*): a  
827 comparative study using shotgun lipidomics." Exp Gerontol **42**(11): 1053-1062.

828 Mukherjee, A., H. A. Kenny and E. Lengyel (2017). "Unsaturated Fatty Acids Maintain Cancer Cell  
829 Stemness." Cell Stem Cell **20**(3): 291-292.

830 Muller-Schwarze, D. (2003). "The Beaver: Natural History of a Wetlands Engineer. Ithaca, New  
831 York : Cornell University Press."

832 Myung, S. J., R. M. Rerko, M. Yan, P. Platzer, K. Guda, A. Dotson, E. Lawrence, A. J. Dannenberg,  
833 A. K. Lovgren, G. Luo, T. P. Pretlow, R. A. Newman, J. Willis, D. Dawson and S. D. Markowitz (2006).  
834 "15-Hydroxyprostaglandin dehydrogenase is an in vivo suppressor of colon tumorigenesis." Proc  
835 Natl Acad Sci U S A **103**(32): 12098-12102.

836 Nylander, J. A. A. (2004). "MrModeltest v2. Program distributed by the author." Evolutionary  
837 Biology Centre, Uppsala University.

838 Park, J., T. Miyakawa, A. Shiokawa, H. Nakajima-Adachi, M. Tanokura and S. Hachimura (2014).  
839 "Attenuation of migration properties of CD4+ T cells from aged mice correlates with decrease in  
840 chemokine receptor expression, response to retinoic acid, and RALDH expression compared to  
841 young mice." Biosci Biotechnol Biochem **78**(6): 976-980.

842 Patel, R. K. and M. Jain (2012). "NGS QC Toolkit: a toolkit for quality control of next generation  
843 sequencing data." PLoS One **7**(2): e30619.

844 Pollard, A. K., T. L. Ingram, C. A. Ortori, F. Shephard, M. Brown, S. Liddell, D. A. Barrett and L.  
845 Chakrabarti (2019). "A comparison of the mitochondrial proteome and lipidome in the mouse and  
846 long-lived *Pipistrelle* bats." Aging (Albany NY) **11**(6): 1664-1685.

847 Putnam, N. H., B. L. O'Connell, J. C. Stites, B. J. Rice, M. Blanchette, R. Calef, C. J. Troll, A. Fields, P.  
848 D. Hartley, C. W. Sugnet, D. Haussler, D. S. Rokhsar and R. E. Green (2016). "Chromosome-scale  
849 shotgun assembly using an in vitro method for long-range linkage." Genome Res **26**(3): 342-350.

850 Qu, W., Y. Zhou, Y. Zhang, Y. Lu, X. Wang, D. Zhao, Y. Yang and C. Zhang (2012). "MFEprimer-2.0:  
851 a fast thermodynamics-based program for checking PCR primer specificity." Nucleic Acids Res  
852 **40**(Web Server issue): W205-208.

853 Rentzsch, P., D. Witten, G. M. Cooper, J. Shendure and M. Kircher (2019). "CADD: predicting the  
854 deleteriousness of variants throughout the human genome." Nucleic Acids Res **47**(D1): D886-  
855 D894.

856 Sahm, A., M. Bens, M. Platzner and K. Szafranski (2017). "PosiGene: automated and easy-to-use  
857 pipeline for genome-wide detection of positively selected genes." Nucleic Acids Res.

858 Scarabino, D., R. Scacchi, A. Pinto and R. M. Corbo (2015). "Genetic Basis of the Relationship  
859 Between Reproduction and Longevity: A Study on Common Variants of Three Genes in Steroid  
860 Hormone Metabolism--CYP17, HSD17B1, and COMT." Rejuvenation Res **18**(5): 464-472.

861 Schmidleithner, L., Y. Thabet, E. Schonfeld, M. Kohne, D. Sommer, Z. Abdullah, T. Sadlon, C. Osei-  
862 Sarpong, K. Subbaramaiah, F. Copperi, K. Haendler, T. Varga, O. Schanz, S. Bourry, K. Bassler, W.  
863 Krebs, A. E. Peters, A. K. Baumgart, M. Schneeweiss, K. Klee, S. V. Schmidt, S. Nussing, J. Sander,  
864 N. Ohkura, A. Waha, T. Sparwasser, F. T. Wunderlich, I. Forster, T. Ulas, H. Weighardt, S. Sakaguchi,  
865 A. Pfeifer, M. Bluher, A. J. Dannenberg, N. Ferreiros, L. J. Muglia, C. Wickenhauser, S. C. Barry, J.  
866 L. Schultze and M. Beyer (2019). "Enzymatic Activity of HPGD in Treg Cells Suppresses Tconv Cells  
867 to Maintain Adipose Tissue Homeostasis and Prevent Metabolic Dysfunction." Immunity **50**(5):  
868 1232-1248 e1214.

869 Seluanov, A., V. N. Gladyshev, J. Vijg and V. Gorbunova (2018). "Mechanisms of cancer resistance  
870 in long-lived mammals." Nat Rev Cancer **18**(7): 433-441.

871 Simao, F. A., R. M. Waterhouse, P. Ioannidis, E. V. Kriventseva and E. M. Zdobnov (2015). "BUSCO:  
872 assessing genome assembly and annotation completeness with single-copy orthologs." Bioinformatics **31**(19): 3210-3212.

873 Singh, S., C. Brocker, V. Koppaka, Y. Chen, B. C. Jackson, A. Matsumoto, D. C. Thompson and V.  
874 Vasiliou (2013). "Aldehyde dehydrogenases in cellular responses to oxidative/electrophilic  
875 stress." Free Radic Biol Med **56**: 89-101.

876 Soneson, C., M. I. Love and M. D. Robinson (2015). "Differential analyses for RNA-seq: transcript-  
877 level estimates improve gene-level inferences." F1000Res **4**: 1521.

878 Song, G. X., Y. H. Shen, Y. Q. Liu, W. Sun, L. P. Miao, L. J. Zhou, H. L. Liu, R. Yang, X. Q. Kong, K. J.  
879 Cao, L. M. Qian and Y. H. Sheng (2012). "Overexpression of FABP3 promotes apoptosis through  
880 inducing mitochondrial impairment in embryonic cancer cells." J Cell Biochem **113**(12): 3701-  
881 3708.  
882



883 St-Onge, M. P. and D. Gallagher (2010). "Body composition changes with aging: the cause or the  
884 result of alterations in metabolic rate and macronutrient oxidation?" *Nutrition* **26**(2): 152-155.  
885 Stamatakis, A. (2014). "RAxML version 8: a tool for phylogenetic analysis and post-analysis of large  
886 phylogenies." *Bioinformatics* **30**(9): 1312-1313.  
887 Stanke, M. and S. Waack (2003). "Gene prediction with a hidden Markov model and a new intron  
888 submodel." *Bioinformatics* **19** **Suppl 2**: ii215-225.  
889 Subramanian, A., P. Tamayo, V. K. Mootha, S. Mukherjee, B. L. Ebert, M. A. Gillette, A. Paulovich,  
890 S. L. Pomeroy, T. R. Golub, E. S. Lander and J. P. Mesirov (2005). "Gene set enrichment analysis: a  
891 knowledge-based approach for interpreting genome-wide expression profiles." *Proc Natl Acad Sci*  
892 *U S A* **102**(43): 15545-15550.  
893 Tamura, K., F. U. Battistuzzi, P. Billings-Ross, O. Murillo, A. Filipski and S. Kumar (2012). "Estimating  
894 divergence times in large molecular phylogenies." *Proc Natl Acad Sci U S A* **109**(47): 19333-19338.  
895 Tarailo-Graovac, M. and N. Chen (2009). "Using RepeatMasker to identify repetitive elements in  
896 genomic sequences." *Curr Protoc Bioinformatics* **Chapter 4**: Unit 4 10.  
897 The UniProt, C. (2017). "UniProt: the universal protein knowledgebase." *Nucleic Acids Res* **45**(D1):  
898 D158-D169.  
899 Trumble, S. J. and S. B. Kanatous (2012). "Fatty Acid use in Diving Mammals: More than Merely  
900 Fuel." *Front Physiol* **3**: 184.  
901 Vassalli, G. (2019). "Aldehyde Dehydrogenases: Not Just Markers, but Functional Regulators of  
902 Stem Cells." *Stem Cells Int* **2019**: 3904645.  
903 Vergnes, L., R. Chin, S. G. Young and K. Reue (2011). "Heart-type fatty acid-binding protein is  
904 essential for efficient brown adipose tissue fatty acid oxidation and cold tolerance." *J Biol Chem*  
905 **286**(1): 380-390.  
906 Wang, G., X. Zhang, J. S. Lee, X. Wang, Z. Q. Yang and K. Zhang (2012). "Endoplasmic reticulum  
907 factor ERLIN2 regulates cytosolic lipid content in cancer cells." *Biochem J* **446**(3): 415-425.  
908 Wolfson, M., A. Budovsky, R. Tacutu and V. Fraifeld (2009). "The signaling hubs at the crossroad  
909 of longevity and age-related disease networks." *Int J Biochem Cell Biol* **41**(3): 516-520.  
910 Wu, R., T. Liu, P. Yang, X. Liu, F. Liu, Y. Wang, H. Xiong, S. Yu, X. Huang and L. Zhuang (2017).  
911 "Association of 15-hydroxyprostaglandin dehydrogenase and poor prognosis of obese breast  
912 cancer patients." *Oncotarget* **8**(14): 22842-22853.  
913 Ye, J., G. Coulouris, I. Zaretskaya, I. Cutcutache, S. Rozen and T. L. Madden (2012). "Primer-BLAST:  
914 a tool to design target-specific primers for polymerase chain reaction." *BMC Bioinformatics* **13**:  
915 134.  
916 Ye, M. H., J. L. Chen, G. P. Zhao, M. Q. Zheng and J. Wen (2010). "Associations of A-FABP and H-  
917 FABP markers with the content of intramuscular fat in Beijing-You chicken." *Anim Biotechnol*  
918 **21**(1): 14-24.  
919 Zalewski, K., D. Martysiak-Zurowska, M. Chylinska-Ptak and B. Nitkiewicz (2009). "Characterization  
920 of Fatty Acid Composition in the European Beaver (Castor fiber L.)." *Polish Journal of*  
921 *Environmental Studies* **18**(3): 493-499.  
922 Zdobnov, E. M., F. Tegenfeldt, D. Kuznetsov, R. M. Waterhouse, F. A. Simao, P. Ioannidis, M.  
923 Seppey, A. Loetscher and E. V. Kriventseva (2017). "OrthoDB v9.1: cataloging evolutionary and  
924 functional annotations for animal, fungal, plant, archaeal, bacterial and viral orthologs." *Nucleic*  
925 *Acids Res* **45**(D1): D744-D749.  
926 Zhang, J., R. Nielsen and Z. Yang (2005). "Evaluation of an improved branch-site likelihood method  
927 for detecting positive selection at the molecular level." *Mol Biol Evol* **22**(12): 2472-2479.

928 Zhou, X., Q. H. Dou, F. G.Y., Z. Q.W., M. Sanderford, A. Kaya, J. Johnson, E. Karlsson, X. Tian, M. A.,  
929 S. Kuma, A. Seluanov, Z. D. Zhang, V. Gorbunova, L. X. and V. N. Gladyshev (2020). "Beaver and  
930 naked mole rat genomes reveal common approaches to longevity." Cell Rep(Accepted).  
931 Ziouzenkova, O., G. Orasanu, M. Sharlach, T. E. Akiyama, J. P. Berger, J. Viereck, J. A. Hamilton, G.  
932 Tang, G. G. Dolnikowski, S. Vogel, G. Dueter and J. Plutzky (2007). "Retinaldehyde represses  
933 adipogenesis and diet-induced obesity." Nat Med **13**(6): 695-702.  
934

935 **Figures and Tables**

A

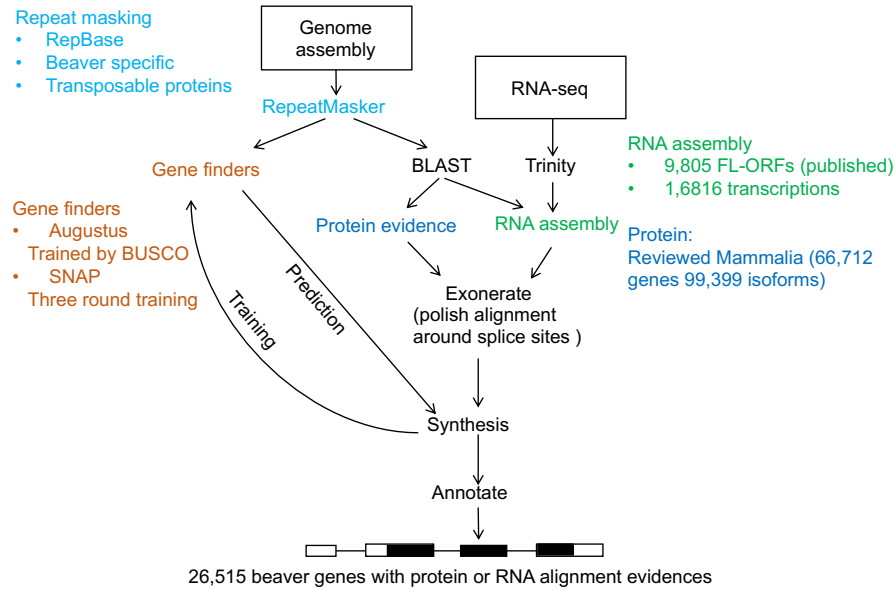

B

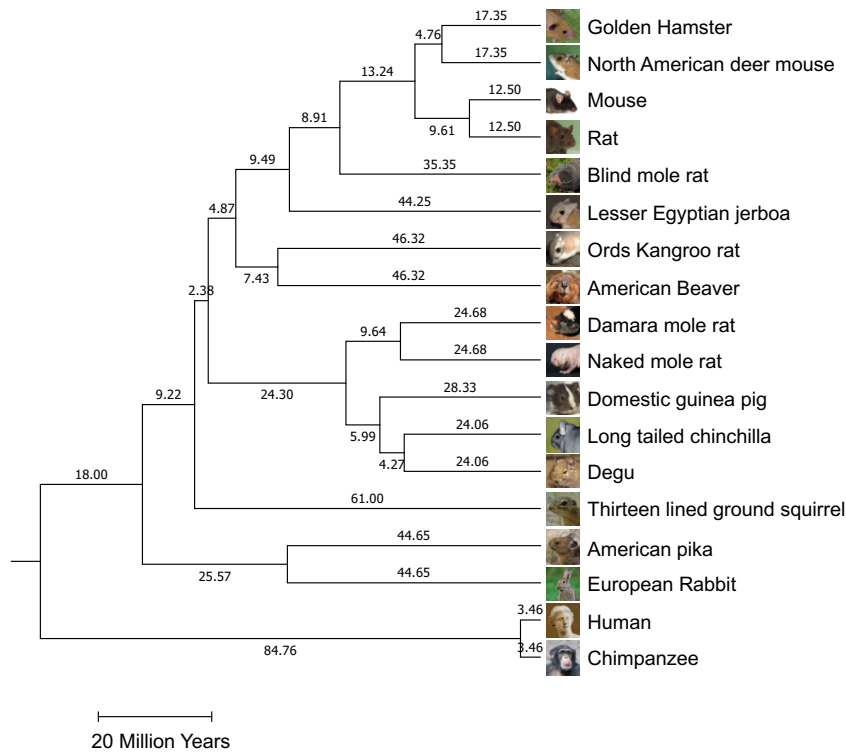

936 **Figure 1. Genome annotation and phylogeny. (A)** The beaver genome annotation  
 937 pipeline. As a part of the annotation, we used 9,805 full-length open reading frames (FL-  
 938 ORFs) from the published beaver genome (Lok, Paton et al. 2017). **(B)** Timed  
 939 phylogeny. 5,087 single copy genes were used for the analysis.

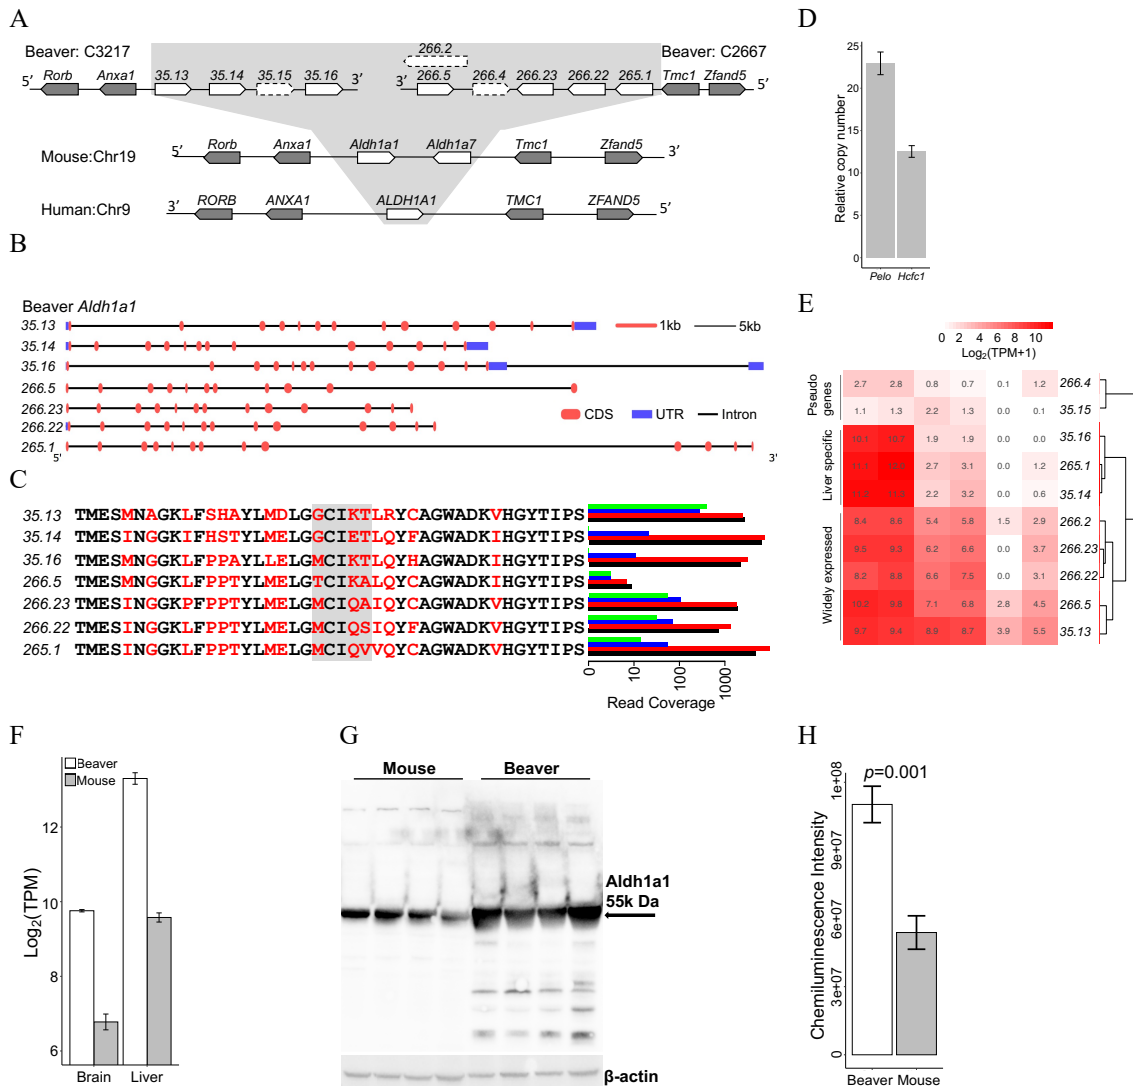

940 **Figure 2. Expansion of *Aldh1a1* in the beaver genome.** (A) The synteny of the  
 941 *Aldh1a1* locus in the genomes of beaver, mouse, and human. We identified ten copies of  
 942 *Aldh1a1* in the beaver genome, including two pseudogenes (35.15 and 266.4) and a  
 943 low-quality copy (266.2). (B) Gene structure of the seven functional copy of *Aldh1a1*. (C)  
 944 RNA-seq reads coverage at genomic locations of different amino acid residues among  
 945 seven *Aldh1a1* gene products. Variable sites were highlighted in red, and the gray box  
 946 indicates the selected sites where we checked the coverage of RNA-seq reads. We  
 947 analyzed RNA-Seq reads from four beaver samples, B1-4 (**Supplementary Table 1**),  
 948 separately. (D) Validation of the *Aldh1a1* copy number by qPCR. Two single-copy genes  
 949 were used as references: *Hcfc1* on an autosome and *Pelo* on Chromosome X. (E)  
 950 Expression profiles of *Aldh1a1* copies across several different beaver tissues. (F)  
 951 *Aldh1a1* expression in liver and brain of both beavers and mice. For each tissue, we  
 952 measured the expression of *Aldh1a1* in 2 beaver individuals and 8 mouse individuals.  
 953 (G) Western blot of *Aldh1a1* protein from beaver and mouse liver extracts of 4 different  
 954 samples of each species. (H) Quantified *Aldh1a1* levels in liver extracts. It is statistically  
 955 higher ( $P = 0.001$  by single side Welch Two Sample *t*-test) in beaver liver than in mouse  
 956 liver.

957 **A**

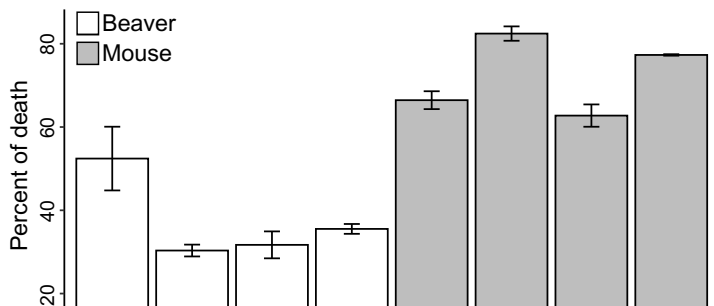

958

**B**

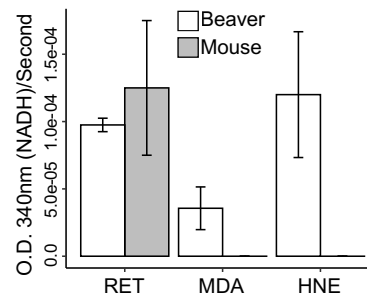

959 **Figure 3. Functional characterization of *Aldh1a1*.** (A) Cell viability. Beaver lung fibroblasts have  
960 lower percentage of death in the presence of high-concentration ethanol, normalized by  
961 corresponding controls ( $p=0.002$  by mixed effects model, see **Methods**). (B) Aldehyde metabolic  
962 activity. Enhanced *Aldh1a1* activity of beaver in aldehyde metabolism. Activities are normalized by  
963 corresponding controls without any addition (see **Methods**). RET: all-trans-retinal; MDA:  
964 malonaldehyde; HNE: 4-hydroxynonenal. Lung fibroblasts were used in experiments of panels A.  
965 Cytosolic extracts from hepatocytes were used for the experiment of panel B. 4 different biological  
966 samples of each species were used in experiments of **A** and **B**), with 3 replicates of each sample.

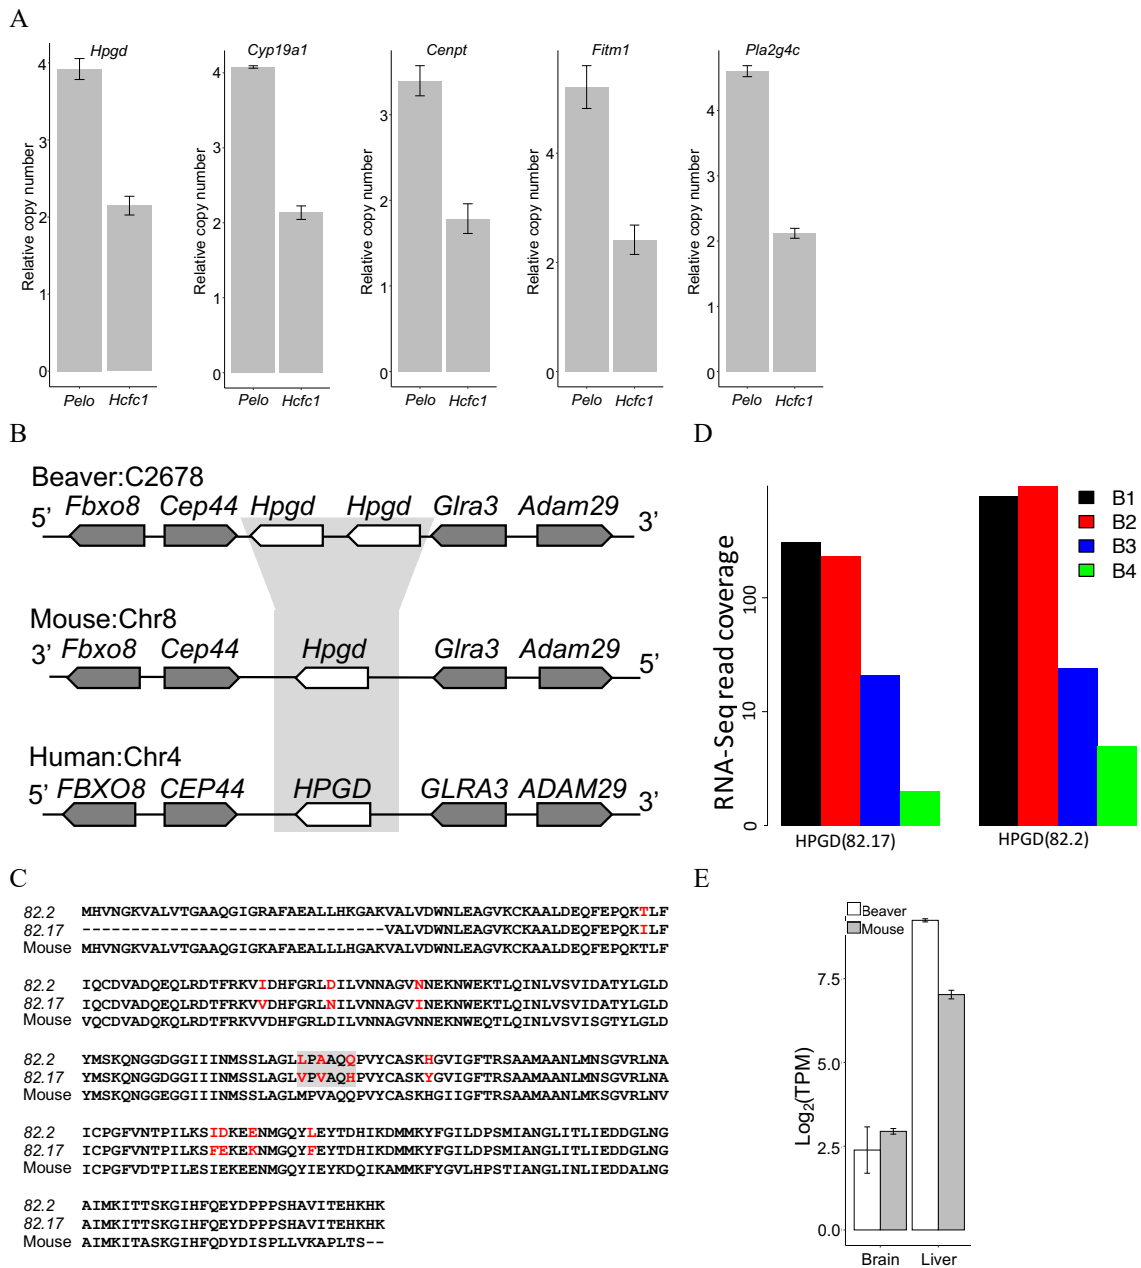

967 **Figure 4. Beaver-specific gene expansion, including tumor suppressor *Hpgd*.** (A)  
968 qPCR validation of the copy number of beaver-specific expanded genes. The copy  
969 numbers relative to the reference gene on chromosome X (i.e., *Pelo*) and on an  
970 autosome (i.e., *Hcfc1*) are shown for each candidate gene. (B) Synteny at the *Hpgd*  
971 locus. (C) Alignment of beaver and mouse *Hpgd* protein sequences. Variable sites are  
972 highlighted in red, and the gray box indicates the selected sites where we checked the  
973 coverage of RNA-seq reads. (D) Coverage of RNA-seq reads at the selected sites in  
974 individual beavers. (E) Expression of *Hpgd* in brain and liver of both beavers and mice.

975 **A**

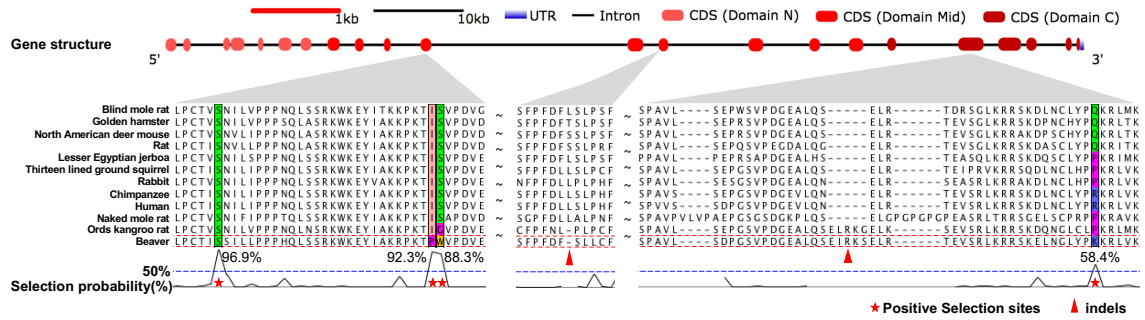

976

977 **B**

| Evolutionary changes<br>(Human→Beaver) | Predicted deleterious score |           |       |
|----------------------------------------|-----------------------------|-----------|-------|
|                                        | PROVEAN                     | PolyPhen2 | CADD  |
| S→S (AGT→TCG)                          | 0.00                        | -         | 10.62 |
| I→P (ATC→CCC)                          | -3.51                       | 0.92      | 23.00 |
| S→W (AGT→TGG)                          | -2.94                       | 0.95      | 21.70 |
| L→∅ (deletion)                         | -3.44                       | -         | 13.26 |
| ∅→EIRKS (insertion)                    | -6.12                       | -         | 14.50 |
| R→K (AGA→AAA)                          | 0.23                        | 0.00      | 0.13  |

978

979 **Figure 5. *Mtbp* is under positive selection. (A)** Positive selection signals in *Mtbp* gene. We  
 980 observed nucleotide positions and indels under positive selection in coding sequences of three  
 981 exons, corresponding to the middle and the C domains of *Mtbp*. **(B)** Nucleotide sequence changes  
 982 between the beaver and the human genomes. We predicted the deleteriousness of these changes  
 983 based on their human genome annotation, using the following metrics and thresholds: PROVEAN  
 984 score < -2.5, 0.85 < Polyphen2 score < 1.0, and CADD score > 20.

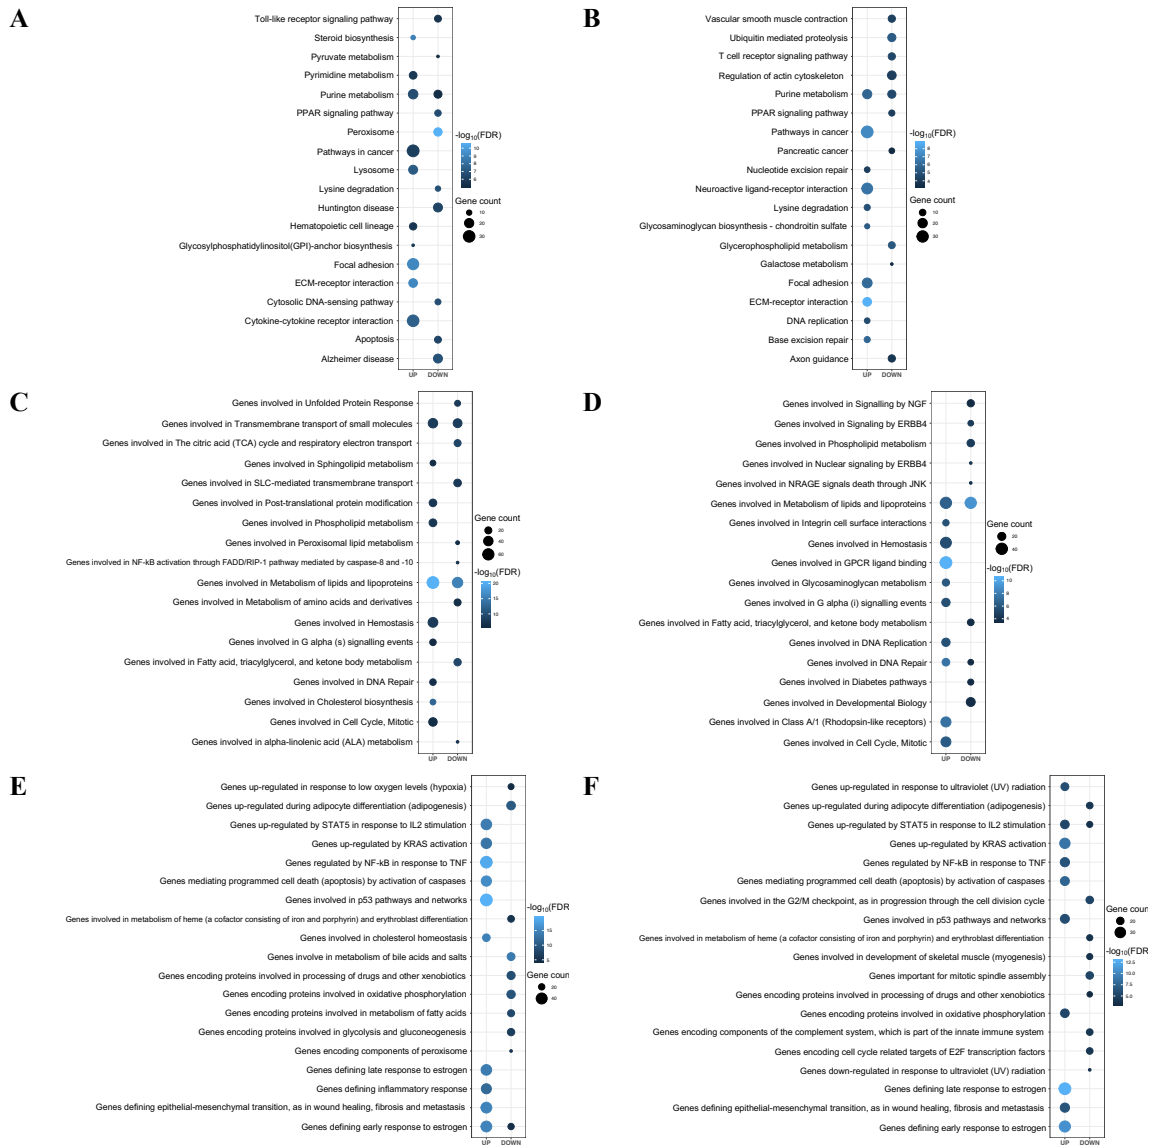

985 **Figure 6. Gene sets enriched with genes differentially expressed between beavers**  
 986 **and mice. (A)** KEGG signaling pathways enriched with differential expression genes in  
 987 liver tissue. **(B)** KEGG signaling pathways enriched with differential expression genes in  
 988 brain tissue. **(C)** REACTOM pathways enriched with differential expression genes in liver  
 989 tissue. **(D)** REACTOM pathways enriched with differential expression genes in brain  
 990 tissue. **(E)** Hallmark gene sets enriched with differential expression genes in liver tissue.  
 991 **(F)** Hallmark gene sets enriched with differential expression genes in brain tissue. UP:  
 992 enriched pathways of up-regulated genes in beaver tissue comparing to mouse tissue.  
 993 DOWN: enriched pathways of down-regulated genes in beaver tissue comparing to  
 994 mouse tissue. Top 10 enriched pathways of up- and down- regulated genes are shown  
 995 for each type of gene sets. Hallmark gene sets from the Molecular Signatures Database  
 996 represent specific well-defined biological states or processes and display coherent  
 997 expression (Liberzon, Birger et al. 2015).



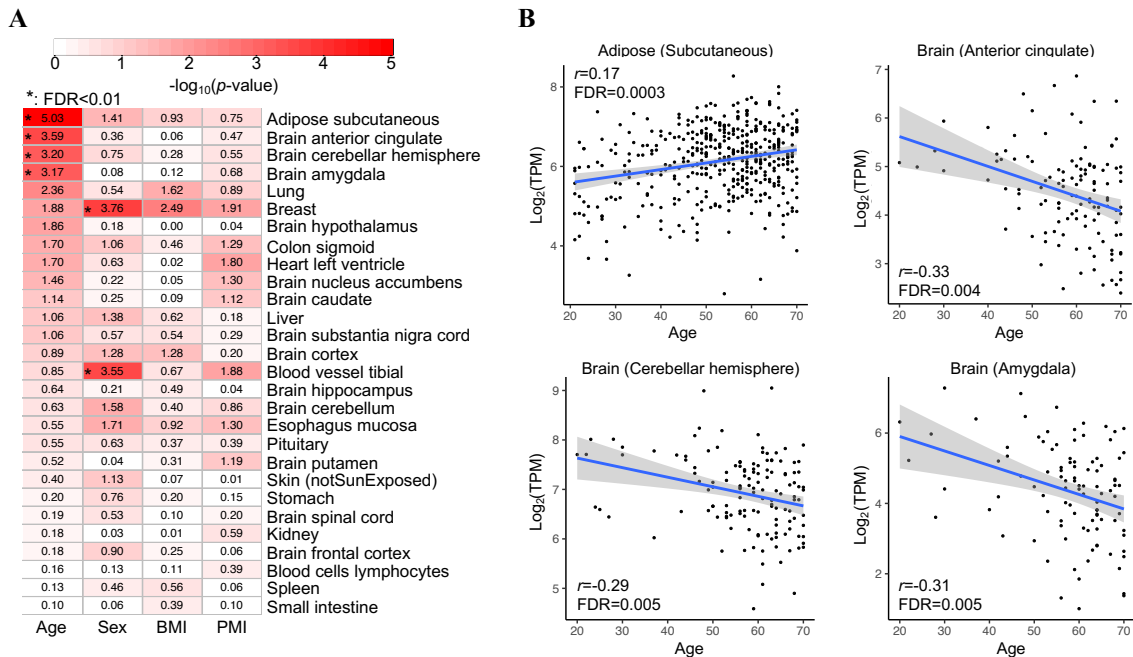

998 **Figure 7. Age-associated expression of *ALDH1A1* in human.** (A) Correlation of  
 999 *ALDH1A1* expression with age, sex, body mass index (BMI), and post-mortem interval  
 1000 (PMI, minutes between death and sample collection). Tissues are ordered according to  
 1001 the *P*-values of the correlation with age. A significant correlation (FDR < 0.01) is denoted  
 1002 by an asterisk. (B) Significant correlation between *ALDH1A1* expression and age in four  
 1003 human tissues. The gray shaded area around the regression line indicates 95%  
 1004 confidence interval.

**Table 1.** Putative positive selection genes in beaver (FDR < 0.01)

| Gene           | Gene name                                              | Num. seq. <sup>1</sup> | Num. sites <sup>2</sup> | FDR      |
|----------------|--------------------------------------------------------|------------------------|-------------------------|----------|
| <i>Mtbp</i>    | MDM2 Binding Protein                                   | 12                     | 4                       | 6.58E-04 |
| <i>Ptx3</i>    | Pentraxin 3                                            | 16                     | 6                       | 1.56E-03 |
| <i>Tbxa2r</i>  | Thromboxane A2 Receptor                                | 15                     | 6                       | 2.75E-03 |
| <i>Hsd17b1</i> | Hydroxysteroid 17-Beta Dehydrogenase 1                 | 14                     | 6                       | 3.32E-03 |
| <i>Erlin2</i>  | ER Lipid Raft Associated 2                             | 18                     | 3                       | 3.86E-03 |
| <i>Fabp3</i>   | Fatty Acid Binding Protein 3                           | 17                     | 7                       | 3.86E-03 |
| <i>Adam19</i>  | ADAM Metallopeptidase Domain 19                        | 18                     | 6                       | 4.38E-03 |
| <i>Cilp2</i>   | Cartilage Intermediate Layer Protein 2                 | 14                     | 30                      | 5.07E-03 |
| <i>Chst12</i>  | Carbohydrate Sulfotransferase 12                       | 18                     | 5                       | 5.07E-03 |
| <i>Urb2</i>    | URB2 Ribosome Biogenesis Homolog                       | 16                     | 4                       | 5.07E-03 |
| <i>Mrpl37</i>  | Mitochondrial Ribosomal Protein L37                    | 18                     | 6                       | 5.07E-03 |
| <i>Depdc7</i>  | DEP Domain Containing 7                                | 17                     | 7                       | 5.61E-03 |
| <i>Neu2</i>    | Neuraminidase 2                                        | 12                     | 3                       | 6.07E-03 |
| <i>Vwa5a</i>   | Von Willebrand Factor A Domain Containing 5A           | 10                     | 16                      | 6.07E-03 |
| <i>Cox15</i>   | Cytochrome C Oxidase Assembly Homolog COX15            | 18                     | 4                       | 6.64E-03 |
| <i>Gdf2</i>    | Growth Differentiation Factor 2                        | 17                     | 9                       | 7.31E-03 |
| <i>Sit1</i>    | Signaling Threshold Regulating Transmembrane Adaptor 1 | 10                     | 4                       | 7.31E-03 |
| <i>Aoc1</i>    | Amine Oxidase Copper Containing 1                      | 17                     | 9                       | 8.02E-03 |
| <i>Cyb5a</i>   | Cytochrome B5 Type A                                   | 18                     | 1                       | 8.52E-03 |
| <i>Scn4b</i>   | odium Voltage-Gated Channel Beta Subunit 4             | 16                     | 6                       | 8.64E-03 |
| <i>Il23a</i>   | Interleukin 23 Subunit Alpha                           | 16                     | 4                       | 1.00E-02 |

## Notes:

1. Num. seq.: the number of available orthologous sequences from a subset of our selected 18 species to build the high-quality alignment for detecting selection signals.

2. Num. sites: the number of amino acid residues that show selection signal in beavers.

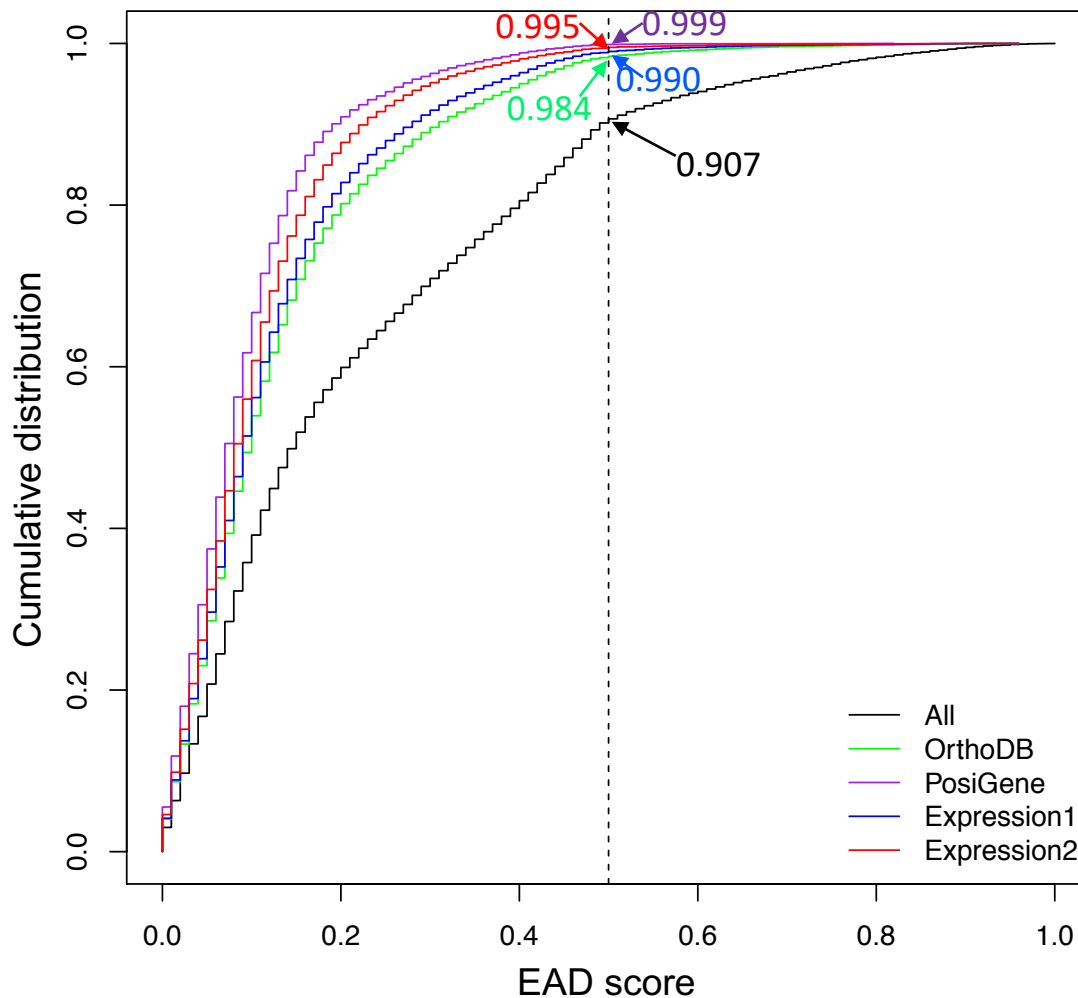

1006

1007 **Figure S1. Related to Figure 1. Cumulative Distribution of AED score.** All: 26,515 predicted  
 1008 genes; OrthoDB: 17,661 genes grouped into gene families by mapping beaver proteins to  
 1009 OrthoDB(Zdobnov, Tegenfeldt et al. 2017); PosiGene: 9,750 genes with coding sequences of at  
 1010 least 10 species in the alignment for identification of genes under positive selection; Expression1:  
 1011 16,303 beaver genes with mouse orthologs; Expression2: 12,089 beaver genes with one-to-one  
 1012 mouse orthologs. An AED (Annotation Edit Distance) score measures the goodness of fit of each  
 1013 gene to the evidence supporting it. The dashed line shows the EAD score = 0.5. A genome is  
 1014 considered well annotated if more than 90% genes have AED scores < 0.5(Campbell, Holt et al.  
 1015 2014).

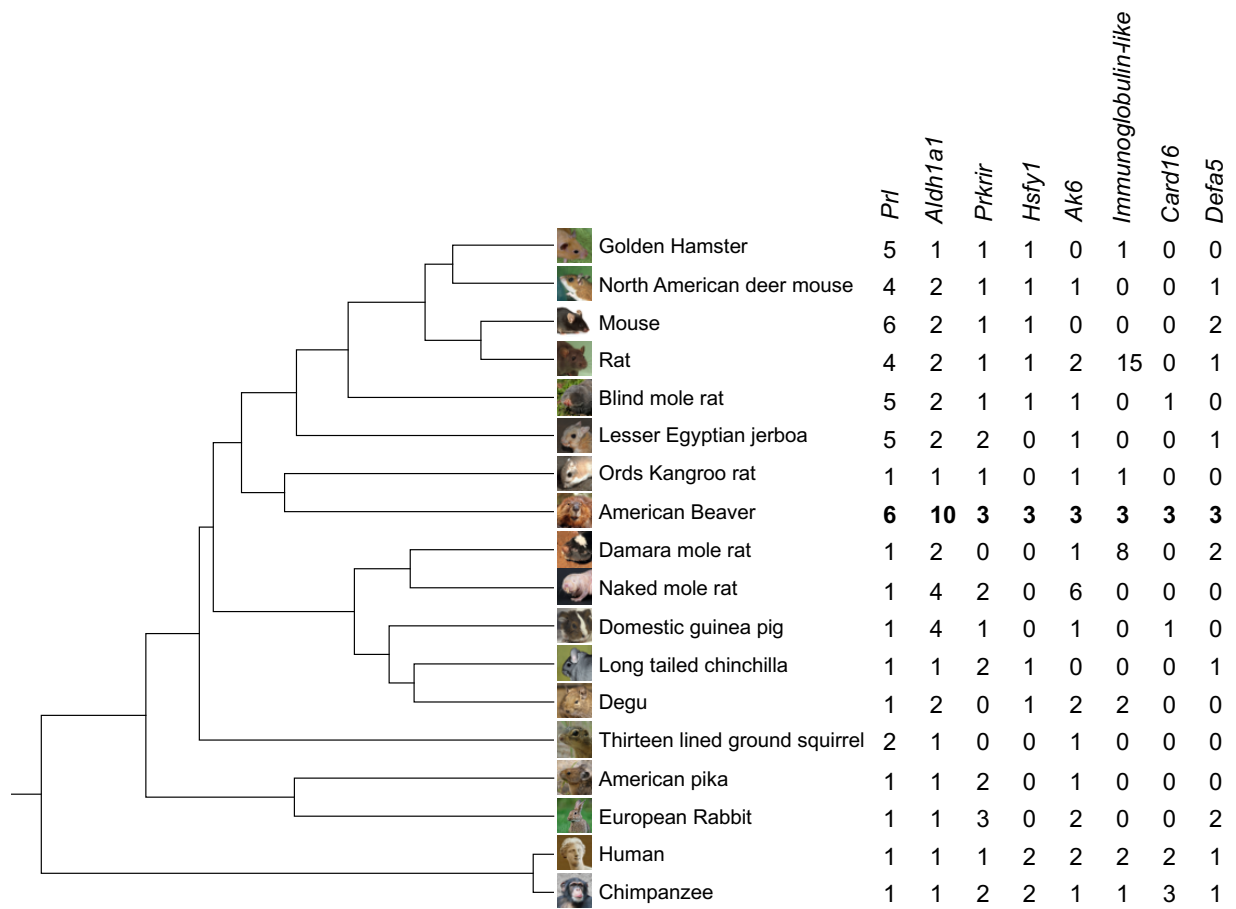

1016

1017 **Figure S2. Related to Figure 2. Gene families with significant expansion in beavers.** *Prl*:  
 1018 prolactin; *Aldh1a1*: aldehyde dehydrogenase 1 family member A1; *Prkrir*: 52-KDa repressor of the  
 1019 inhibitor of the protein kinase; *Hsfy1*: heat shock transcription factor Y-linked 1; *Ak6*: adenylate  
 1020 kinase 6; *Immunoglobulin-like*: no gene name but with Immunoglobulin-like domain; *Card16*:  
 1021 caspase recruitment domain family member 16; *Defa5*: defensin alpha 5.

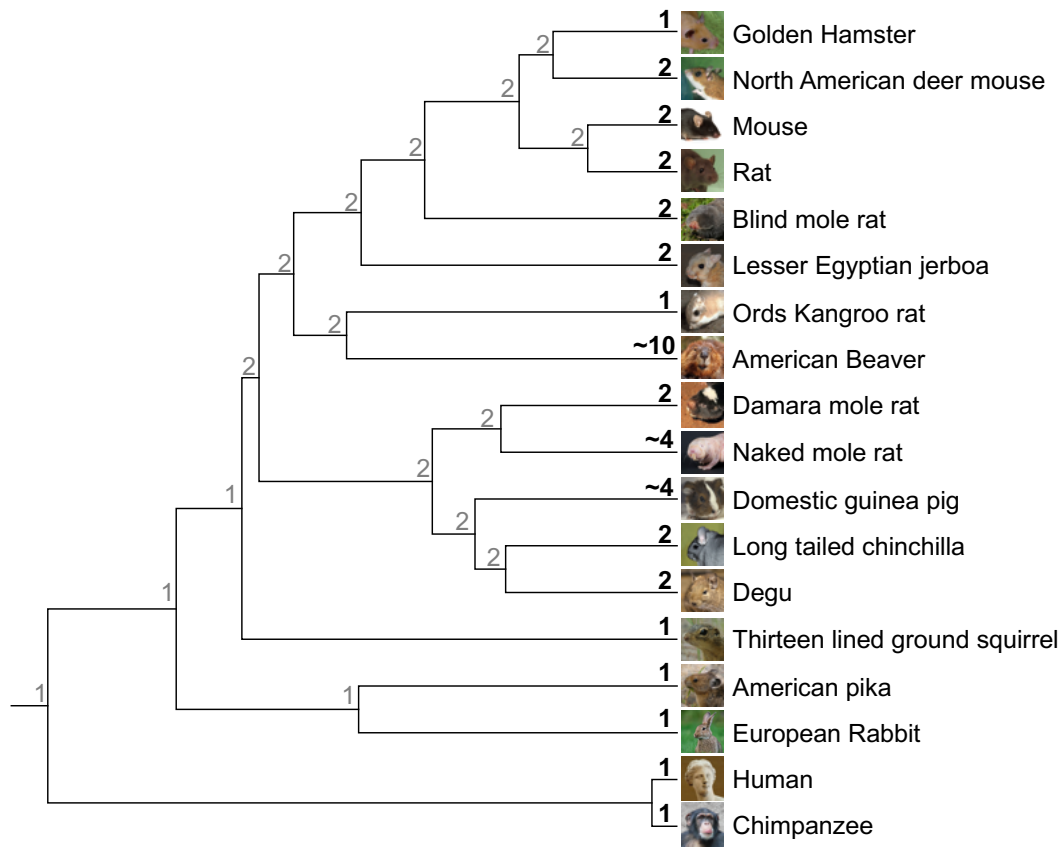

1022

1023 **Figure S3. Related to Figure 2. Phylogenetic tree with *Aldh1a1* copy numbers.** Shown on the  
 1024 leaf and the ancestral nodes are the copy numbers (in black) of *Aldh1a1* in species annotated by  
 1025 this study and OrthoDB(Zdobnov, Tegenfeldt et al. 2017) and ones (in gray) estimated by  
 1026 CAFE3(Han, Thomas et al. 2013), respectively.

1027 A

Legend: ! Frame shift  
[] Intron boundaries

Mouse(Aldh1a1) 1 MSSPAQVAVPAPLADLKIOTK  
M +P +P PL +LKIQ+TK  
MFSGKPDLPPLTLNLKIQYTK  
Beaver(35.15) 5068 acttgagctcaccataactaaGTTAGTA Intron 1 CAG  
tatcgacatccctcataataca<0-----[5134 : 7621]->  
ggctagacatccactgggtgtg

Beaver(35.15) 19469 ggtccgggaaacgtgcaagggttagtag  
cgctccgttattcgagccgctccataatactcgcca  
agttttggccctttagtagacctcgtcagccgaaag

1028

1029 B

Legend: ! Frame shift; [] Intron boundaries

Mouse(Aldh1a1) 169 WNFPLMFIWIKIPALSCGNTVVVPAEQTLTALHSLIKE  
WN P+LMFIWK ALS GNTV+VKPAEQTLTALH+ASLIKE  
WNGPLMFIWIKTALALSYGNTVVKPAEQTLTALHMASLIKE  
Beaver(266.4) 36295 tagctcatataagcgcgatgaagagcgcacagcagcttaag  
gagctttttgacccctgagactttaccaaccctctctaa  
gtaagtgcggaattctcaggtcaatgactcttcgatacag

Mouse(Aldh1a1) 302 CCVAASRIFV-EESVYDFVKRSVERAKYV-LGNLPTGINQGPQ  
C +A + F E YD+FY+R AK + L L NQGPQ  
CVIACIQAFWENPFYDFVRRK!AKAGIFLETLDSRNNQGPQ  
Beaver(266.4) 28058 tgagtactgctgacttggtgaaatgagaggttagcctaaacccc  
gttcctgactggaactaaattggag ccacgtttattacgaagaac  
ctactcgttggtgacttttgagg gtaatacaattcgccttactg

1030

1031

Mouse(Aldh1a1) 285 -DIA-VEFAHHGVFYHGG  
+A EFAH G+++ G  
GSLAELEFAHGGIIFOTG!  
Beaver(266.4) 30129 GAGTATTAC Intron 3 AAGTgtttggtgcccgaatcag5  
<2-----[30127 : 28119]-> gctcatcaagtttacg  
aagtagatcacagtttaag

Mouse(Aldh1a1) 423 NTTYGLAAGLFTKDLKAITVSSALQAGVW  
NT YGLAAG+FTK LD+AITVSSALQAGVW  
NTPYGLAAGVFTKGLDRAITVSSALQAGVW  
Beaver(266.4) 20211 aactgtgggtaagcagagaagttgcggggg  
accagctcgttcagtagctctctcactggtg  
ctctcgaactcactcacaaccttgggtgag

**1032 C**

**1033** Aldh1a1

**1034** 35.13 MLSSGKPDLPPTLNLIKQYTKIFINNEWHNSVSGKKFPVLNPATEEEICQIEEGDKADV

**1035** 35.14 MQFSGKPDLPPTLNLIKQYTKIFINNEWHNSVSGKKFPVLNPATEEEICQVEEGDKADV

**1036** 35.16 MQSSRQPDLPAPIANLIKQYTKIFINNEWHNSVSGKKFPVLNPATEEEICQVEEGDKADV

**1037** 266.22 MQSSGKSDLPTPLANLIKQYTKIFINNEWHNSVSGKKFPVLNPATEEEICQVEEGDKADV

**1038** 266.23 MQSSGKPDLPPTPLANLIKQYTKIFINNEWHNSVSGKKFVVLNPATEEEICQVEEGDKADV

**1039** 265.1 MQSGKSDLPTPLANLIKQYTKIFINNEWHNSVSGKKFPVLNPATEEEICQVEEGDKADV

**1040** 266.5 MQSSGKSDLPTPLANLIHYTKIFINNEWHNSVSGKKFPVLNPATEEEICQVEEGDKADV

**1041** Aldh1a7 (Mouse) MSSPAQPAVPAPLANLIKQHTKIFINNEWHNSVSGKKFPVLNPATEEEICQVEEGDKADV

**1042** Aldh1a1 (Mouse) MSSPAQPAVPAPLADLIKQHTKIFINNEWHNSVSGKKFPVLNPATEEEICQVEEGDKADV

**1043** ALDH1A1 (Human) MSSSGTDLPLVLLTDLKIYTKIFINNEWHNSVSGKKFPVFNPAATEEEELCQVEEGDKEDV

**1044**

**1045** 35.13 DKAVKAARQAFQIGSPWRTMDASERGRLLFKLADLIERDRLLLATMESMNAKGLFSHAYL

**1046** 35.14 DKAVKAARQAFQIGSPWRTMDASERGRLLFKLAKLIERDRLLLATMESINGGKIFHSTYL

**1047** 35.16 DKAVKAARQAFQIGSPWRTMDASQRGRLLKLDLIERDRLLLATMESMNGGKLFPPAYL

**1048** 266.22 DKAVKAARQAFQIGSPWRTMDASERGRLLFKLALIERDRLLLATMESINGGKLFPPAYL

**1049** 266.23 DKAVKAARQAFQIGSPWRTMDASQRGRLLFKLADLIERDRLLLATMESINGGKFPPTYL

**1050** 265.1 DKAVKAARQAFQIGSPWRTMDASQRGRLLFKLADLIERDRLLLATMESINGGKLFPPAYL

**1051** 266.5 DKAVKAARQAFQIGSPWRTMDASQRGRLLFKLADLIERDRLLLATMESMNGGKLFPPAYL

**1052** Aldh1a7 (Mouse) DKAVKAARQAFQIGSPWRTMDASERGRLLNKLADLMERDRLLLATMESMNAKGVFAHAYL

**1053** Aldh1a1 (Mouse) DKAVKAARQAFQIGSPWRTMDASERGRLLNKLADLMERDRLLLATMEALNGGKVFANAYL

**1054** ALDH1A1 (Human) DKAVKAARQAFQIGSPWRTMDASERGRLLYKLADLIERDRLLLATMESMNGGKLYSNAYL

**1055**

**1056** 35.13 MDLGGCIKTLRYCAGWADKVHGYTIPSDGDVFTYTRREPIGVCGQIIPWNFPLVMLIWKL

**1057** 35.14 MELGGCIETLQYFAGWADKIHGTYTIPSDGDVFTYTRREPIGVCGQIIPWNFLDMLIWKI

**1058** 35.16 LELGMCIKTLQYHAGWADKIHGTYTIPSDGDVFTYTRREPIGVCGQIIPWNAFLMFLTKI

**1059** 266.22 MELGMCIQSIQYFAGWADKVHGYTIPSDGDVFTYTRREPIGVCGQIIPWNGPLIVLLSKI

**1060** 266.23 MELGMCIQAIQYFAGWADKVHGYTIPSDGDVFTYTRREPIGVCGQIIPWNGPLLMFLTKI

**1061** 265.1 MELGMCIQVVQYFAGWADKVHGYTIPSDGDVFTYTRREPIGVCGQIIPWNGPLIILLSKI

**1062** 266.5 MELGTICIKALQYFAGWADKIHGTYTIPSDGDVFTYTRREPIGVCGQIIPWNGPLITLTKI

**1063** Aldh1a7 (Mouse) LDVEISIKALQYFAGWADKIHGTYTIPSDGNIFTYTRREPIGVCGQIIPWNGPLIIFTWKL

**1064** Aldh1a1 (Mouse) SDLGGCIKALKYFAGWADKIHGTYTIPSDGDIFTYTRREPIGVCGQIIPWNFPLMFLTKI

**1065** ALDH1A1 (Human) NDLAGCIKTLRYCAGWADKIQGRYIPIDGNFTYTRREPIGVCGQIIPWNFPLVMLIWKI

**1066**

**1067** 35.13 GPALSCGNTVIVKPAEQTPLTALHVASLIKEAGFPPGVVNIIPGYGPTAGAAISSHMDID

**1068** 35.14 APALSCGNTVIVKPAEQTPLTALHVASLIKEAGFPPGVVNIIPGYGPTAGAAISSHMDID

**1069** 35.16 APALSCGNTVIVKPAEQTPLTALHMASLIKEAGFPPGVVNIIPGYGPTAGAAISSHMDID

**1070** 266.22 APALSCGNTVIVKPAEQTPLTALHVASLIKEAGFPPGVVNIIPGYGPTAGAAISSHMDID

**1071** 266.23 APALTCGNTVIVKPAEQTPLTALHMASLIKEAGFPPGVVNIIPGYGPTAGAAISSHMDID

**1072** 265.1 APALSCGNTVIVKPAEQTPLTALHVASLIKEAGFPPGVVNIIPGYGPTAGAAISSHMDID

**1073** 266.5 APALSCGNTVIVKPAEQTPLTALHVASLIKEAGFPPGVVNIIPGYGPTAGAAISSHMDID

**1074** Aldh1a7 (Mouse) GPALSCGNTVIVKPAEQTPLTALHMASLIKEAGFPPGVVNIIPGYGPTAGAAISSHMDID

**1075** Aldh1a1 (Mouse) GPALSCGNTVVVKPAEQTPLTALHVASLIKEAGFPPGVVNIIPGYGPTAGAAISSHMDVD

**1076** ALDH1A1 (Human) GPALSCGNTVVVKPAEQTPLTALHVASLIKEAGFPPGVVNIIPGYGPTAGAAISSHMDID

**1077**

**1078** 35.13 KVAFTGSTEVGKMIKEAAGKSNLKRVTLELGGKSPCIVFADADMDNAVELAHQGLFYHQG

**1079** 35.14 KVAFTGSTEVGKIKEAAGKSNLKRVTLELGGKSPCIVFADADLEQAVEFAHQGVFFHQG

**1080** 35.16 KVAFTGSMVEVGMIKEAAGKSNLKRVTLELGGKSPCIVFADADLDHAVEFAHHGVFAHQG

**1081** 266.22 KVAFTGSTEVGKLIKEAAGKSNLKRVTLELGGKSPCIVFADADLESAVEFAHQGVFLHQG

**1082** 266.23 KVAFTGSTEVGKLIKEAAGKSNLKRVTLELGGKSPCIVFADADLDHAVEFAHQGVFFHQG

**1083** 265.1 KVAFTGSTEVGKLIQEAAAGKSNLKRVSLELGGKSPCIVFADADLDHAVEFAHQGVFFHQG

**1084** 266.5 KVAFTGSTEVGKLIKEAAGKSNLKRVTLELGGKSPCIVFADADLDHAIIEFAHQGVFFHQG

**1085** Aldh1a7 (Mouse) KVSFTGSTEVGKLIKEAAGKSNLKRVTLELGGKSPCIVFADADLDSAVEFAHQGVFFHQG

**1086** Aldh1a1 (Mouse) KVAFTGSTQVGLIKEAAGKSNLKRVTLELGGKSPCIVFADADLDIAVEFAHHGVFFHQG

**1087** ALDH1A1 (Human) KVAFTGSTEVGKLIKEAAGKSNLKRVTLELGGKSPCIVLADADLDNAVEFAHHGVFFHQG

**1088**

**1089** 35.13 QCCVAASRLFVEESIYDEFVRRSVERAKKYVLGNPLTPGITQGPQIDKEQYKILNLIES

**1090** 35.14 QMCIAASRLFVEESIYDEFVRRSVERAKQYILGNPLTPGITQGPQIDKEQHKNKILDIES

**1091** 35.16 QICIAASRLFVDESIYDEFVRRSVERAKQYILGNPLTPGITQGPQIDKEQYKILNLIES

**1092** 266.22 QICVAASRLFVEESIYDEFVRRSVERAKQYILGNPLTPGITQGPQIDKEQHKNKILDIES

**1093** 266.23 QICVAASRLFVEESIYDEFVRRSVERAKQYVLGNPLTPGITQGPQIDKEQHKNKILDIES

**1094** 265.1 QMCVAASRLFVEESIYDEFVRRSVERAKQYILGNPLTPGITQGPQIDKEQHKNKILDIES

**1095** 266.5 QICVAASRLFVEESIYDEFVRRSVERAKQYVLGNPLTPGITQGPQIDKEQHKNKILDIES

**1096** Aldh1a7 (Mouse) QICVAASRLFVEESIYDEFVRRSVERAKKYILGNPLNSGINQGPQIDKEQHKNKILGLIES

**1097** Aldh1a1 (Mouse) QCCVAASRIFVEESIYDEFVRRSVERAKKYVLGNPLTPGINQGPQIDKEQYKILNLIES

**1098** ALDH1A1 (Human) QCCIAASRIFVEESIYDEFVRRSVERAKKYILGNPLTPGVTQGPQIDKEQYKILNLIES

**1099**

1100 35.13 GKKEGATLECGGGPWGNKGYFVQPTVFSNVTDEMRIAKEEIFGFPVQQIMKFKSLDEVIKR  
1101 35.14 GKKEGATLECGGGPWGNKGYFVQPTVFSNVTDEMRIAKEEIFGFPVQQIMKFKSVEVIKR  
1102 35.16 GKKEGATLECGGGPWGNKGYFVQPTVFSNVTDEMRIAKEEIFGFPVQQIMKFKSVDEVIKR  
1103 266.22 GKKEGATLECGGGPWGNKGYFVQPTVFSNVTDEMRIAKEEIFGFPVQQIMKFKSVEVIKR  
1104 266.23 GKKEGATLECGGGPWGNKGYFVQPTVFSNVTDEMRIAKEEIFGFPVQQIMKFKSVEVIKR  
1105 265.1 GKKEGATLECGGGPWGNKGYFVQPTVFSNVTDEMRIAKEEIFGFPVQQIMKFRSVDEVIKR  
1106 266.5 GKKEGATLECGGGPWGNKGYFVQPTVFSNVTDEMRIAKEEIFGFPVQQIMKFKSVDEVIKR  
1107 Aldh1a7 (Mouse) GKKEGAKLECGGGRWGNKGFVQPTVFSNVTDEMRIAKEEIFGFPVQQIMKFKSMDDVIKR  
1108 Aldh1a1 (Mouse) GKKEGAKLECGGGRWGNKGFVQPTVFSNVTDEMRIAKEEIFGFPVQQIMKFKSVDDVIKR  
1109 ALDH1A1 (Human) GKKEGAKLECGGGPWGNKGYFVQPTVFSNVTDEMRIAKEEIFGFPVQQIMKFKSLDDVIKR  
1110  
1111 35.13 ANNTTYGLAAGVFTKDLDKAVTVSAAALQAGTVVWVNCYSLVSAQSPFGGFKMSGNGRELGE  
1112 35.14 ANNTPYGLAAGVFTKDLDRAITISSALQAGTVVWVNCYLMSSAQNPFGGFKMSGNGRELGE  
1113 35.16 ANNTPYGLAAGVFTKDLDKAITVSSALQAGVVWVNCYLMSSVQNPFGGFKMSGNGREMGE  
1114 266.22 ANNTPYGLAAGVFTKDLDRAMTVASALQAGVVWVNCYLMSSVQDPFGGFKMSGNGREMGE  
1115 266.23 ANNTPYGLAAGVFTKDLDKAITVSSALQAGVVWVNCYLMSSVQNPFGGFKMSGNGREMGE  
1116 265.1 ANNTTYGLAAGVFTKDLDKAITISSALQAGVV-VNCYLMSSVQDPFGGFKMSGNGREMGE  
1117 266.5 ANNTHYGLAAGVFTKDLDRAMEN-----  
1118 Aldh1a7 (Mouse) ANNTTYGLAAGVFTKDLDKAITVSSALQAGVVWVNCYLAVPVQCPFGGFKMSGNGRELGE  
1119 Aldh1a1 (Mouse) ANNTTYGLAAGVFTKDLDKAITVSSALQAGVVWVNCYMMLSAQCPFGGFKMSGNGRELGE  
1120 ALDH1A1 (Human) ANNTFYGLSAGVFTKDLDKAITISSALQAGTVVWVNCYGVVSAQCPFGGFKMSGNGRELGE  
1121  
1122 35.13 EGLQ<sup>E</sup>YTEIKTVTMKISQKNSX  
1123 35.14 EGVLEYTEIKTVTMKISQKNSX  
1124 35.16 EGVLEYTEIKTVTMKISQKNSX  
1125 266.22 EGVLEYTEIKTVTMKISQKNSX  
1126 266.23 DGI<sup>I</sup>LEYTEIKTVTVKISQKNSX  
1127 265.1 EGVLEYTEIKTVT-----X  
1128 266.5 -----LVARCPS  
1129 Aldh1a7 (Mouse) HGLY<sup>E</sup>EYTELKTVAMQISQKNSX  
1130 Aldh1a1 (Mouse) HGLY<sup>E</sup>EYTELKTVAMKISQKNSX  
1131 ALDH1A1 (Human) YGFHEYTEVKTVTVKISQKNSX  
1132  
1133 **D**

1134 Aldh1a1  
1135 266.5 IFGFPVQQIMKFKSVDEVIKRANNTTYGLAAGVFTKDLDRAMEN-----  
1136 35.13 IFGFPVQQIMKFKSLDEVIKRANNTTYGLAAGVFTKDLDKAVTVSAAALQAGTV  
1137 35.14 IFGFPVQQIMKFKSVEVIKRANNTPYGLAAGVFTKDLDRAITISSALQAGTV  
1138 35.16 IFGFPVQQIMKFKSVDEVIKRANNTPYGLAAGVFTKDLDKAITVSSALQAGVV  
1139 266.22 IFGFPVQQIMKFKSVEVIKRANNTPYGLAAGVFTKDLDRAMTVASALQAGVV  
1140 266.23 IFGFPVQQIMKFKSVEVIKRANNTPYGLAAGVFTKDLDKAITVSSALQAGVV  
1141 265.1 IFGFPVQQIMKFRSVDEVIKRANNTTYGLAAGVFTKDLDKAITISSALQAGVV  
1142

RNA-seq coverage at the unique site in copy 266.5

| B1  | B2  | B3 | B4 |
|-----|-----|----|----|
| 975 | 954 | 58 | 28 |

1143 **Figure S4. Related to Figure 2. Predicted beaver *Aldh1a1* copies.** Two copies are likely  
1144 pseudogenes. Gene structures of (A) copy 35.15 with a frame-shift indel (highlighted in red) and  
1145 (B) copy 266.4 with two frame-shift indels. (C) Multiple sequence alignment of beaver *Aldh1a1* with  
1146 of mouse and human orthologs. Amino acid residues in red show divergent evolution among  
1147 different copies in the beaver genome. (D) RNA-seq coverage at the unique amino acid residue in  
1148 beaver *Aldh1a1* 266.5. The alignment of peptide sequences encoded by exon 11 is shown. Variable  
1149 sites were highlighted in red, and the gray box indicates the selected sites where we checked the  
1150 coverage of RNA-seq reads. The amino acid residue in copy 266.5 is different from the ones in all  
1151 other copies. The table below shows the RNA-seq read coverage at genome region corresponding  
1152 to this unique amino acid residue based on RNA-seq data from each of four beaver individuals (see  
1153 **Supplement Table S1**).



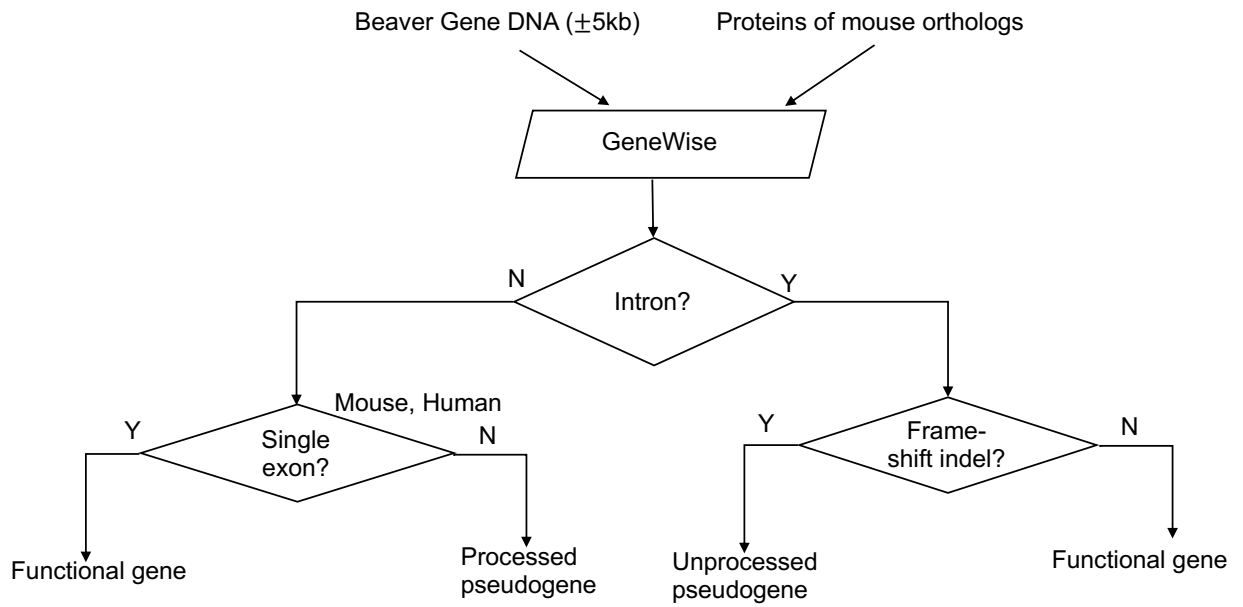

1154

1155 **Figure S5. Related to Figure 2. Pseudogene identification pipeline.**

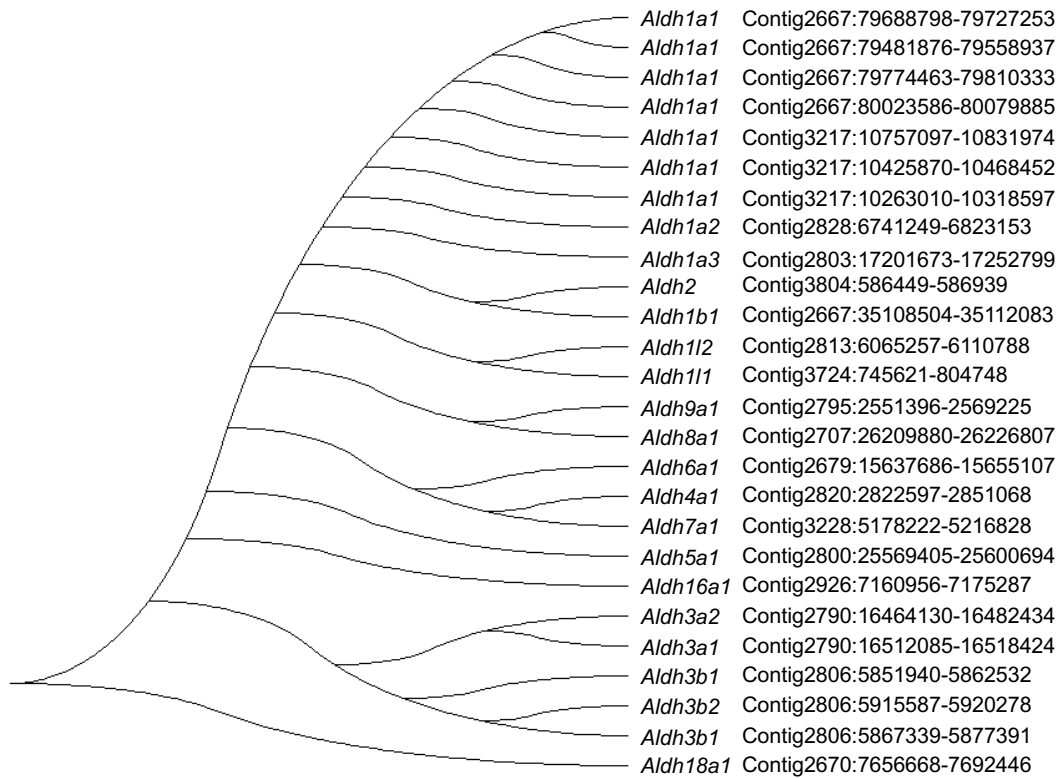

1156

1157 **Figure S6. Related to Figure 2. Phylogenetic tree of beaver *Aldh*.** The genome coordinates of  
 1158 each gene are given after the gene names.

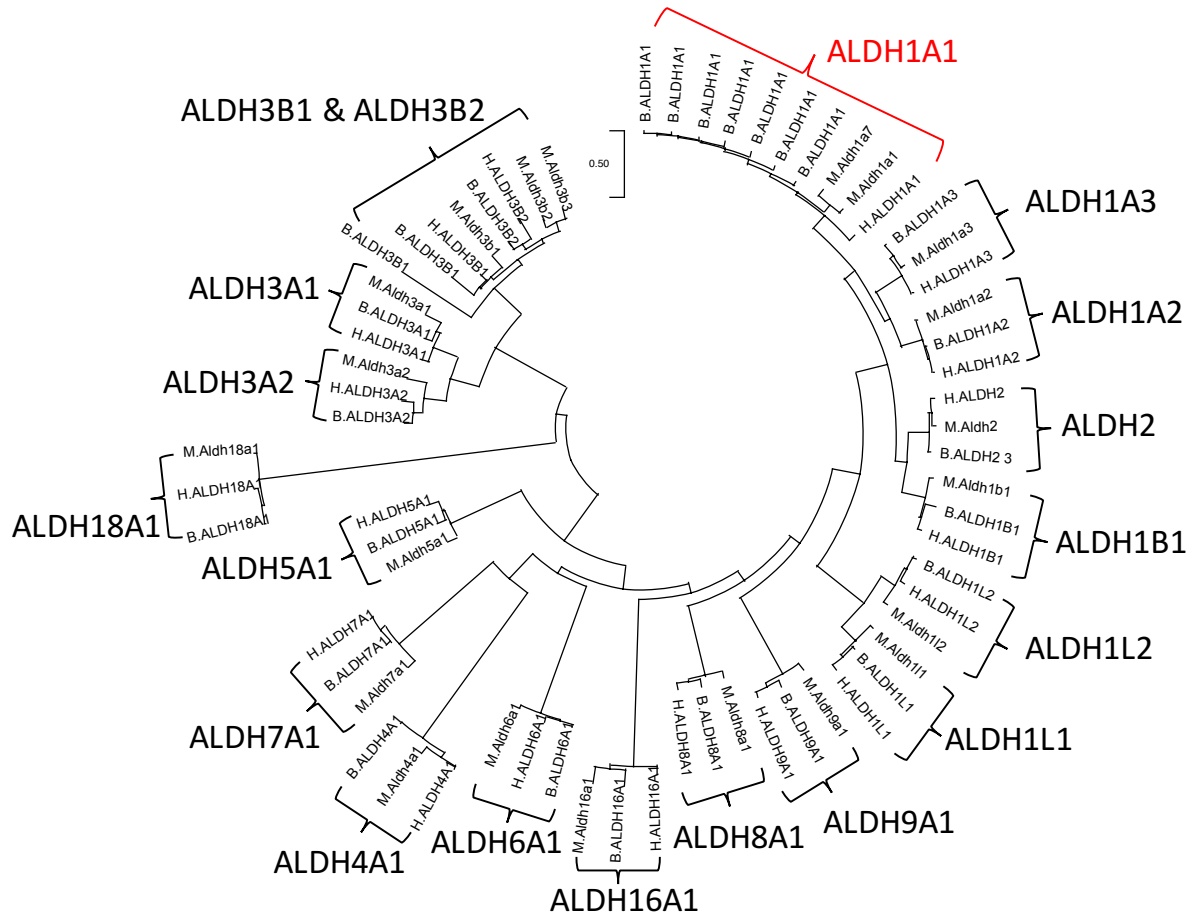

1159

1160 **Figure S7. Related to Figure 2. Phylogeny of beaver, mouse, and human *ALDH*.** The letter  
 1161 prefix of the gene name denotes the species: B for beaver, M for mouse, and H for human. Gene  
 1162 annotation of each beaver *Aldh* gene was manually checked, and manually editing was done by  
 1163 Apollo(Lee, Helt et al. 2013), according to RNA-Seq reads alignment, when it was necessary.

1164

**A**

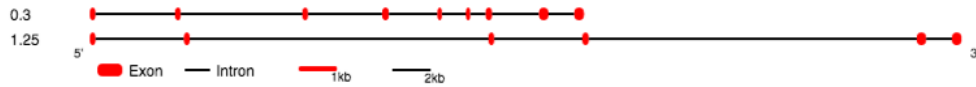

1165

1166

1167

1168

1169

1170

1171

1172

1173

1174

1175

1176

1177

1178

1179

1180

1181

1182

1183

1184

1185

1186

1187

1188

1189

1190

1191

1192

1193

1194

1195

1196

1197

1198

1199

1200

1201

1202

1203

1204

1205

1206

1207

1208

1209

1210

1211

**B**

```

0.3 (Beaver)      MVLEKLNPMDYNVTSMVLEVVVPVGAMPLLLLLTGILLIWNYENTSSIPGPAYCLGIGPII
1.25 (Beaver)    MVLEKLNPMHYNVTSMVPEVVVPVGAMPLLLLLTGILLIWNYENTSSIPGPAYCLGIGPLI
Cyp19a1 (Mouse)  MFLEMLNPMQYNVTIMVPETVTVSAMPLLLIMGLLLIWNCESSSSIPGGYCLGIGPLI
CYP19A1 (Human) MVLEMLNPIHYNITSIVPEAMPAATMPVLLLTGLFLLVWNYEGTSSIPGGYCMGIGPLI

0.3 (Beaver)      SHSRFLWMGIGSACNYNKMYGEFMRVWISGEETLIISKSSSMFHMKHNKYISRFGSKL
1.25 (Beaver)    SHGRFLWMGIGSACNYNKMYGEFMRVWISGEETLIISKSSSMFHMKHNKYISRFGSKL
Cyp19a1 (Mouse)  SHGRFLWMGIGSACNYNKMYGEFMRVWISGEETLIISKSSSMFHMKHSHYISRFGSKR
CYP19A1 (Human)  SHGRFLWMGIGSACNYNRVYGEFMRVWISGEETLIISKSSSMFHMKHNHYSSRFGSKL

0.3 (Beaver)      GLQCIGMHEKGIIFNNNPDLWKEVRLFFMKALTGPGLVRMAVCAESILRHLDKLDEVTS
1.25 (Beaver)    GLQCIGMHEKGIIFNNNPDVWKEVRPPFMKALTGPGLVRMAVCAESILRHLDKLDEVTD
Cyp19a1 (Mouse)  GLQCIGMHENGIIFNNNPSLWRTIRPFMKALTGPGLVRMVEVCVESIKQHLDRLGEVTD
CYP19A1 (Human)  GLQCIGMHEKGIIFNNNPELWKTTRPFMKALSGPGLVRMVTVCAESLKTHLDRLEEVTN

0.3 (Beaver)      ALGYVDVLTLMRRIMLDTSNVFFLGIPLD-----
1.25 (Beaver)    ALGYVDVLTLMRRIMLDTSNVLFLGIPLDESAIVNKIRGYFDAWQALLKPNIFFKISWL
Cyp19a1 (Mouse)  TSGYVDVLTLMRHIMLDTSNMLFLGIPLDESAIVKIQGYFNAWQALLKPNIFFKISWL
CYP19A1 (Human)  ESGYVDVLTLLRRVMDLTNTLFLRIPLDESAIVVKIQGYFDAWQALLKPDIFFKISWL

0.3 (Beaver)      -----
1.25 (Beaver)    YKKYKSVKDLKDKAIDVLVEEKRHQVSMAEKLEDCMDFATDLIFAEKRGELTKNEVNQCI
Cyp19a1 (Mouse)  YRKYERSVKDLKDEAIVLVEEKRHKVSTAEKLEDCMDFATDLIFAERRGDLTKNEVNQCI
CYP19A1 (Human)  YKKYEKSVKDLKDKAIEVLIAEKRRRISTEEKLEECMDFATELILAEKRGDLTRENVNQCI

0.3 (Beaver)      -----GERDIQMNDIQKLKVVENFI
1.25 (Beaver)    LEMLIAAPDTMSVTVYFMLSLIAKHPNVEEEIMKEIQTVVGERDIQMNDIQKLKVVENFI
Cyp19a1 (Mouse)  LEMLIAAPDTMSVTLYFMLLVAEYPEVEAAILKEIHTVVGDRDIKIEDIQNLKVVENFI
CYP19A1 (Human)  LEMLIAAPDTMSVSLFFMLFLIAKHPNVEEAIKEIQTVIGERDIKIDDIQKLKVMENFI

0.3 (Beaver)      YESLRYHPAVDLVMRRALEDDVIDGYPVKKGTNIILNIGRMHRLEYFFPKPNEFTLENFEK
1.25 (Beaver)    YESLRYHPAVDLVMRRALEDDVIDGYPVKKGTNIILNIGRMHRLEYFFPKPNEFTLENFEK
Cyp19a1 (Mouse)  NESMRYQPVVDLVMRRALEDDVIDGYPVKKGTNIILNIGRMHRLEYFFPKPNEFTLENFEK
CYP19A1 (Human)  YESMRYQPVVDLVMRRALEDDVIDGYPVKKGTNIILNIGRMHRLEYFFPKPNEFTLENFAK

0.3 (Beaver)      NVPYRYFQPFGFGPRGCAGKYIAMVMMKVVLVTLLRRYHVETLRGQCVEDIQKVNDLSVH
1.25 (Beaver)    NVPYRYFQPFGFGPRGCAGKYIAMVMMKVVLVTLLRRYHVETLRGQCVEDIQKVNDLSVH
Cyp19a1 (Mouse)  NVPYRYFQPFGFGPRGCAGKYIAMVMMKVVLVTLLRRFQVKTLQKRCIENIPKKNDLSLH
CYP19A1 (Human)  NVPYRYFQPFGFGPRGCAGKYIAMVMMKAILVTLLRRFHVKTLQQCVESIQKIHDLSLH

0.3 (Beaver)      PDETSDLLEMVFIPRNSVKCLNQ-
1.25 (Beaver)    PDETSDLLEMVFIPRNSVKCLNQ-
Cyp19a1 (Mouse)  PNEDRHLVEIIFSPRNSDKYLQQ*
CYP19A1 (Human)  PDETKNMLEMIFTPRNSDRCLE--

```

**C**

| Gene | B1 | B2  | B3 | B4 |
|------|----|-----|----|----|
| 0.3  | 8  | 9   | 0  | 5  |
| 1.25 | 24 | 419 | 0  | 0  |

The amino acid letters with grey background (panel b) show where we checked the RNA-Seq reads coverage on the corresponding genome loci.

1212

**Figure S8. Related to Figure 4. Duplication of Cyp19a1. A)** Gene structure of beaver Cyp19a1.

1213

**B)** Protein sequence alignment. Sequences with grey background show where we check the RNA-

1214

Seq reads coverage. **C)** RNA-Seq reads coverage at unique sites.

1215

1216

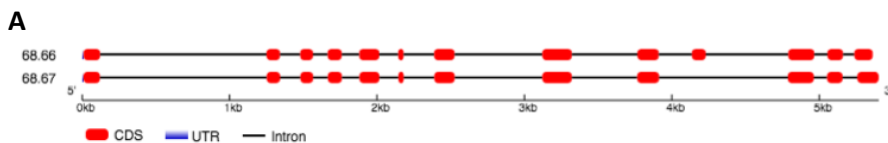

1217  
1218  
1219  
1220  
1221  
1222  
1223  
1224  
1225  
1226  
1227  
1228  
1229  
1230  
1231  
1232  
1233  
1234  
1235  
1236  
1237  
1238  
1239  
1240  
1241  
1242  
1243  
1244  
1245  
1246  
1247  
1248  
1249  
1250  
1251  
1252  
1253  
1254  
1255  
1256  
1257  
1258  
1259  
1260  
1261  
1262  
1263  
1264  
1265  
1266  
1267  
1268  
1269  
1270  
1271  
1272  
1273

**B**

Coding Sequence

```
68.67 (Beaver)   aaaaacctgcttgaacaccttctccagagactgaggagccaaacagagacgactgcc
68.66 (Beaver)   AAAAACCTGCTTGAACACCTTCTCCAGAGACTGAGGAGCCAAACAGAGACGACTGCC
```

Protein sequence

```
68.67 (Beaver)   MADFYSSDSELTTRTLRRVLDTADSLTPRRRRAQAGAQTLLLETPSSRRLRSQTETTA
68.66 (Beaver)   MADFYSSDSELTTRTLRRVLDTADSLTPRRRRAQAGAQTLLLETPSSRRLRSQTETTA
Cenpt (Mouse)   MADLSFSDGDPVTVRTLLRRVLETADSRTPMRRRSTRINAQRRRSQTPYSNRQGSQTKTSA
CENPT (Human)   MAD-HNPDSSTPRTLLRRVLDTADPRTPRRPR SARAGARRALLETASPRKLSGQTRTIA

68.67 (Beaver)   RQRSHGARSIGRLAHGQASGSLEEKTPRTLRLNILLTAPESSIVMPDSVVKPV SAPQVVQ
68.66 (Beaver)   RQRSHGARSIGRLAHGQASGSLEEKTPRTLRLNILLTAPESSIVMPDSVVKPV SAPQVVQ
Cenpt (Mouse)   RKQSHGARSVGRSTRVQGRGLEEQTPRTLRLNILLTAPESSTVMPDPVVKPAQVPEVAR
CENPT (Human)   RGRSHGARSVGRSAHIQASGHLEEQTPTLLKNILLTAPESSILMPESVVKPV PAPAQAVQ

68.67 (Beaver)   SSRKSSRGSLELQLPELEPPSTLAPGLPALGRRKQRLRLSVFQQEVNQELPLSQEPFG-
68.66 (Beaver)   SSRKSSRGSLELQLPELEPPSTLAPGLPALGRRKQRLRLSVFQQEVNQELPLSQEPFG-
Cenpt (Mouse)   SSRRESRGSLELHLPELEPPSTLAPGLTAPGRRKQRLRLSVFQQEVDQGLPLSQEPFRS-
CENPT (Human)   PSRQESSCGSLELQLPELEPPTLAPGLLAPGRRKQRLRLSVFQQGVDQGLSLSQEPFG-

68.67 (Beaver)   -NADASALTSNLNLT FATPLQPQSVRRPGLARRPPTTRRAVDVGALLQDLRDNLSLAS---G
68.66 (Beaver)   -NADASALTSNLNLT FATPLQPQSVRRPGLARRPPTTRRAVDVGALLQDLRDNLSLAS---G
Cenpt (Mouse)   RSADVSSLASFNLT FVLPQPETVERPGLARRRPIRQLVNAGALLQDLEDNLSALALPG
CENPT (Human)   -NADASSLTRSNLNT FATPLQPQSVQRPGLARRPPARRAVDVGAFRLRDLRDTSLA-----

68.67 (Beaver)   NSHRTPAALPTDTVLEDTQFFSQPLVGCSPSLHDSLP LPTHTAVEDSERAVGHRTRSRG
68.66 (Beaver)   NSHRTPAALPTDTVLEDTQFFSQPLVGCSPSLHDSLP LPTHTAVEDSERAVGHRTRSRG
Cenpt (Mouse)   DSHRTPVAALPMDVGL EDTQFFSQSLAAFSLSGKHSPLPSRPGVEDVERVMGPPSS--G
CENPT (Human)   -----PPNIVLEDTQFFSQPMVGS P-NVYHSLPCTPHTGAEDAEQAAGRKTQSSG

68.67 (Beaver)   PRLQNHKL--Y---P-----WPTTSQEVTE-----GEGFREAEVA
68.66 (Beaver)   PRLQNHKL--Y---P-----WPTTSQEVTE-----GEGFREAEVA
Cenpt (Mouse)   TRLQSRMRSRGPAASPFFLEPQPPP-----AE-----PR-----
CENPT (Human)   PGLQKNSP--G---KPAQFLAGEAEVNAFALGFLSTSSGVSGEDEVEPLHDGVEEAEKK

68.67 (Beaver)   -----KELEGSSGDEDT S-----DRPSKRPIAEIS
68.66 (Beaver)   -----KELEGSSGDEDT S-----DRPSKRPIAEIT
Cenpt (Mouse)   -----EAVG-----SNEAAEPKDEGSSGVEETS-----ARPA
CENPT (Human)   MEEEGVSVSEMEATGAQGPSRVEEAEHTEVTEAEAGSQGTAEADGPGASSGDEDEDASGRAA

68.67 (Beaver)   -----NLPSEPLEPMLARLPRRPRTAGPRPRQDPY
68.66 (Beaver)   CPELASSTPEFLQAKQPHFLDPTPSLGV TILPSEPLEPMLARLPRRPRTAGPRPRQDPY
Cenpt (Mouse)   SGE LSSSTHDSL P-----AEQPPSPGVAVLSSSEPLESVTAKCPSRTQTAGPRRRQDPH
CENPT (Human)   SPESASSTPESLQARRHHQFLEPAPAPGA AVLSSSEPAEPLLVHRHPPRPTGTGPRPRQDPH

68.67 (Beaver)   KAGLSHYAKLFSFYAKMPMEKAAMEMVEKCLDKYFQHL CNDLEVF AAHAGRKT V RPE DLE
68.66 (Beaver)   KAGLSHYAKLFSFYAKMPMEKAAMEMVEKCLDKYFQHL CNDLEVF AAHAGRKT V RPE DLE
Cenpt (Mouse)   KAGLSHYAKLFSFYAKMPMEKALEMVEKCLDKYFQHL CNDLEVF AAHAGRKT V RPE DLE
CENPT (Human)   KAGLSHYAKLFSFYAKMPMEKALEMVEKCLDKYFQHL CNDLEVF AAHAGRKT V RPE DLE

68.67 (Beaver)   LLMRR-----LLHVLVERHLPLEYRQLLIPCAFSGNSVFFPAQ-
68.66 (Beaver)   LLMRRQGLVTDQVSLHVLVERHLPLEYRQLLIPCAFSGNSVFFPAQ-
Cenpt (Mouse)   LLMRRQGLVTDQVSLHVLVERHLPLEYRQLLIPCAFSGNSVFFPAQ*
CENPT (Human)   LLMRRQGLVTDQVSLHVLVERHLPLEYRQLLIPCAYSGNSVFFPAQ*
```

**C**

| Gene  | B1 | B2 | B3 | B4 |
|-------|----|----|----|----|
| 68.67 | 18 | 21 | 5  | 16 |
| 68.66 | 8  | 5  | 0  | 0  |

The amino acid letters with grey background (panel B) show where we checked the RNA-Seq reads coverage on the corresponding genome loci. Although there are no difference on amino acid sequence, the coding sequences show differences.

1274  
1275  
1276

**Figure S9. Related to Figure 4. Duplication of *Cenpt*.** A) Gene structure of beaver *Cenpt*. B) Protein sequence alignment. Sequences with grey background show where we check the RNA-Seq reads coverage. C) RNA-Seq reads coverage at unique sites.

1277

**A**

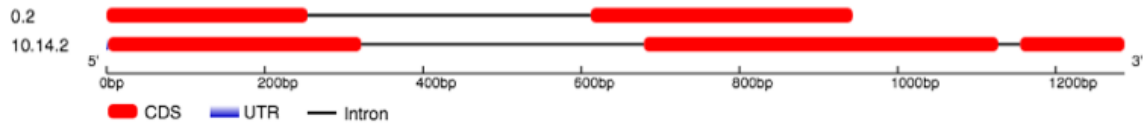

1278

1279

**B**

|      |                 |                                                                       |
|------|-----------------|-----------------------------------------------------------------------|
| 1280 | 10.4.2 (Beaver) | CWGDQPLLCCPAEQAVS GEGREHGAGAVVGARAQIQALLGCLVKVLLWVASALLYFGSEQ         |
| 1281 | 0.2 (Beaver)    | -----MERGPVVG----ARAQIQALLGCLVKVLLWVASALLYFGSEQ                       |
| 1282 | Fitm1 (Mouse)   | -----MERGPTVGAGLGAGTRVRALLGCLVKVLLWVASALLYFGSEQ                       |
| 1283 | FITM1 (Human)   | -----MERGPVVGAGLGAGARIQALLGCLLKVLLWVASALLYFGSEQ                       |
| 1284 |                 |                                                                       |
| 1285 | 10.4.2 (Beaver) | AARLLGSPCLRRLYHAWLAAVVIFG <b>SLL</b> QFHVNSRTIFASHGNFFNIKVFNSAWGWTCTF |
| 1286 | 0.2 (Beaver)    | AARLLGSPCLRRLYHAWLAAVVIFG <b>PLL</b> QFHVNSRTIFASHGNFFNIKVFNSAWGWTCTF |
| 1287 | Fitm1 (Mouse)   | AARLLGSPCLRRLYHAWLAAVVIFG <b>P</b> LLQFHVNSRTIFASHGNFFNIKVFNSAWGWTCTF |
| 1288 | FITM1 (Human)   | AARLLGSPCLRRLYHAWLAAVVIFG <b>P</b> LLQFHVNPRTIFASHGNFFNIKVFNSAWGWTCTF |
| 1289 |                 |                                                                       |
| 1290 | 10.4.2 (Beaver) | LGGFVLLVFLATRRAVAVTARHLSRLVVGAAACGEGPA-GLPPHEDLTGSCFEPLPQGLLL         |
| 1291 | 0.2 (Beaver)    | LGGFVLLVFLATRRAVAVTARHLSRLVVGAAVWRGAGRAFLIEDLTGSCFEPLPQGLLL           |
| 1292 | Fitm1 (Mouse)   | LGGFVLLVFLATRRAVAVTARHLSRLVVGAAVWRGAGRAFLIEDLTGSCFEPLPQGLLL           |
| 1293 | FITM1 (Human)   | LGGFVLLVFLATRRAVAVTARHLSRLVVGAAVWRGAGRAFLIEDLTGSCFEPLPQGLLL           |
| 1294 |                 |                                                                       |
| 1295 | 10.4.2 (Beaver) | HELPPDRRSCLAAGHQWRGYTVSSHTFLLTFCELLMAEEAAVFAKYLAHGLPAGTPLRLVLF        |
| 1296 | 0.2 (Beaver)    | HELPPDRRSCLAAGHQWRGYTVSSHTFLLTFCELLMAE-----                           |
| 1297 | Fitm1 (Mouse)   | HELPPDRKSCLAAGHQWRGYTVSSHTFLLTFCELLMAEEAAVFAKYLAHGLPAGAPLRLVLF        |
| 1298 | FITM1 (Human)   | HELPPDRRSCLAAGHQWRGYTVSSHTFLLTFCELLMAEEAAVFAKYLAHGLPAGAPLRLVLF        |
| 1299 |                 |                                                                       |
| 1300 | 10.4.2 (Beaver) | LLNVLLLGLWNFLLCTV-----VGAAVGTFAWFLTYGSWYHQPWSPGSPGH                   |
| 1301 | 0.2 (Beaver)    | -----                                                                 |
| 1302 | Fitm1 (Mouse)   | LLNVLLLGLWNFLLCTVIYFHQYTHKVVGAAVGTFAWYLTYSWYHQPWSPGIPGHGLF            |
| 1303 | FITM1 (Human)   | LLNVLLLGLWNFLLCTVIYFHQYTHKVVGAAVGTFAWYLTYSWYHQPWSPGSPGHGLF            |
| 1304 |                 |                                                                       |
| 1305 |                 |                                                                       |
| 1306 | 10.4.2 (Beaver) | PHPHSSRKHN-                                                           |
| 1307 | 0.2 (Beaver)    | -----                                                                 |
| 1308 | Fitm1 (Mouse)   | PRSRSMRKHN*                                                           |
| 1309 | FITM1 (Human)   | PRPHSSRKHN*                                                           |

1310

1311

**C**

| Gene   | B1  | B2  | B3  | B4  |
|--------|-----|-----|-----|-----|
| 10.4.2 | 268 | 136 | 579 | 122 |
| 0.2    | 70  | 31  | 265 | 34  |

The amino acid letters with grey background (panel B) show where we checked the RNA-Seq reads coverage on the corresponding genome loci.

1312

1313 **Figure S10. Related to Figure 4. Duplication of *Fitm1*.** A) Gene structure of beaver *Fitm1*. B)

1314 Protein sequence alignment. Sequences with grey background show where we check the RNA-

1315 Seq reads coverage. C) RNA-Seq reads coverage at unique sites.

1316

**A**

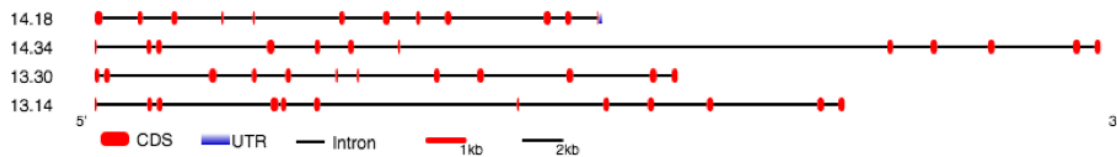

1317

**B**

|      |                 |                                                                 |
|------|-----------------|-----------------------------------------------------------------|
| 1318 |                 |                                                                 |
| 1319 | 14.34 (Beaver)  | MSCEQSPKSLLSKKNRSDGVHITPELQKEEKEAVDNRKTQVVM SLNKLGIKADEAPVLAV   |
| 1320 | 14.18 (Beaver)  | -----                                                           |
| 1321 | 13.30 (Beaver)  | -----HGVLITPELQKEEKEAVDNRKPQVVM SLNKLGIKADEAPVIAV               |
| 1322 | 13.14 (Beaver)  | MSHEQSPKSLLSKKNRSDGVHITPELQKEEKEAVDNRKLQVVM SLNKLGIKADEAPVIAV   |
| 1323 | Pla2g4c (Mouse) | MSCAESPKSLH---KRSSGVC PATRLQEAEKA AVHKRSPKVLEALRKLNIQADQAPVIAV  |
| 1324 | PLA2G4C (Human) | MRTRPRPR--LRR--TENFLTAVHHGKKEEKA AAVERRRLHVLKALKKLRIEAD EAPVVAV |
| 1325 |                 |                                                                 |
| 1326 | 14.34 (Beaver)  | LGSGGGLRAHFACLGVLIE MKNHGLLDVITYLAGVSGSTWALSSFYTNSGNMEHIEADLE   |
| 1327 | 14.18 (Beaver)  | -----ALSSFYTNSGNVEHIEAVLE                                       |
| 1328 | 13.30 (Beaver)  | LGSGGGLRAHFACLGVLIE MKNHGLLDVITYLAGVSGSTWALSSFYTNSGNMDLIEADLE   |
| 1329 | 13.14 (Beaver)  | LGSGGGLRAHFACLGVLSE MKNHGLLDVITYLAGVSGSTWALSSFYTNSGNMEHIEADLE   |
| 1330 | Pla2g4c (Mouse) | LGSGGGLRAHIAACLGVLSE LKELGLLDAVITYLAGVSGSTWALSSLYTKNGNMEGIEEELK |
| 1331 | PLA2G4C (Human) | LGSGGGLRAHIAACLGVLSE MKEQGLLDVITYLAGVSGSTWAISSLYTNDGDMEALEADLK  |
| 1332 |                 |                                                                 |
| 1333 | 14.34 (Beaver)  | HRFELENWSIWESLQKTIEAASLENYSLTDFWAYIVVSRQTREFQGSLLSSMKKHVEKGT    |
| 1334 | 14.18 (Beaver)  | HRFDPENWSIWDSLQKTIEAASLENYSLTDFWAYIVVSRQTREFQDSSLSSIKKHVEKGT    |
| 1335 | 13.30 (Beaver)  | HRFEPENWSVRESLQKTIEVASLENYSLTDFWAYVVISRQTREFQGSLLSSMKKHVEKGT    |
| 1336 | 13.14 (Beaver)  | HRFDPENWSIWDSLQKTIEAASLENYSLTDFWAYIVVSRQTREFQDSSLSSIKKHVEKGT    |
| 1337 | Pla2g4c (Mouse) | HRYEKNEWDFHESLEKAIQASKRENYSLTDFWAYLIVSRQIRELQDSSLSSIKKHVEKGT    |
| 1338 | PLA2G4C (Human) | HRFTRQEWDLAKSLQKTIQAARSENYSLTDFWAYMVISKQTRELPESHLSNMKPPVEEGT    |
| 1339 |                 |                                                                 |
| 1340 | 14.34 (Beaver)  | LPYPPIFAAIDNDLHPGWKDQKTQKSWFEFTPHHAGYPALKSYIPITQFGSQFENGRVLVKS  |
| 1341 | 14.18 (Beaver)  | LPYPPIFAAIDNDLHPVWKDHKTRKSWFEFTPHHAGYPALQAYIPITQFGSQFENGRVLVKS  |
| 1342 | 13.30 (Beaver)  | LPYPPIFAAIDNDLHDDWKDHKTRKSWFEFTPHHAGYPALQAYIPITQLG SQFENGRVLVKS |
| 1343 | 13.14 (Beaver)  | LPYPPIFAAIDNDLHPVWKDHKTRKSWFEFTPHHAGYPALKAYIPITQFGSQFQNGRVLVKS  |
| 1344 | Pla2g4c (Mouse) | LPYPPIFAAIDEDLLADWRERKTONSWFEFTPHHAGYPALGAYVPITQFGSRFENGRVLVKS  |
| 1345 | PLA2G4C (Human) | LPYPPIFAAIDNDLQPSWQEARAPETWFEFTPHHAGFSALGAFVSI THFGSKFKKGRVLRIT |
| 1346 |                 |                                                                 |
| 1347 | 14.34 (Beaver)  | ALERDLSFLRGLWGS AVANTEENKFFIWG-----MIE----KEITVD                |
| 1348 | 14.18 (Beaver)  | APERDLSFLRGLWGS AIANTEENKFFIWDEFSLKEKLLGKHQLTQGMIT----EETA VD   |
| 1349 | 13.30 (Beaver)  | APERDLSFLRGLWGS AVANAENEKFFIWDEFSLKEKLLGKYQLTQGMIT----EETA VD   |
| 1350 | 13.14 (Beaver)  | VPERDISFLR-----DEFSLKDKLLGKHQLTQGMIT----EETA VD                 |
| 1351 | Pla2g4c (Mouse) | EPERDLTFLRGLWGS AFADIKEIKNYILNYFRNP----FGKLFIEGPVITYSEAPRMNVD   |
| 1352 | PLA2G4C (Human) | HPERDLTFLRGLWGS ALGNTEVIREYIFDQLRNLTLKGLWRRAVA-----NAKSIG       |
| 1353 |                 |                                                                 |
| 1354 | 14.34 (Beaver)  | EALLELTVDYIKDEKDP SIQKKLQALQQALDAGRDEHGEPECRKVAMMIQNWSNASQKEQ   |
| 1355 | 14.18 (Beaver)  | EALLELMVAYIKDEKDP SIQKKLQALQQALGARRGKQGEPEYRELAMMI RNWSKASLQER  |
| 1356 | 13.30 (Beaver)  | EALLELMVAYIKDEKDP SIQKKLQALQQALDARRDEHGEPEYKKLAMMIQNWSNASQKEQ   |
| 1357 | 13.14 (Beaver)  | EALLELMVAYIKGEKDS SIQKKLQALQQALDARKGKQGEPEYRELAMMI RNWSKASLQER  |
| 1358 | Pla2g4c (Mouse) | AMLLDLVMAYFTDMNDPS IKDKLQALQQALGTETDEFGI----EMAEI IQNWNETS AEKK |
| 1359 | PLA2G4C (Human) | ----HLIFARLLRLQ-----ESSQGEHPPPEDEGGEPEHTWLTEML ENWTRTSLEKQ      |
| 1360 |                 |                                                                 |
| 1361 | 14.34 (Beaver)  | GLILETLVGHFTGQASTMALSTALS VSK-----                              |
| 1362 | 14.18 (Beaver)  | GQILETLVGHFTRQASTMAVSRALS VYRVTFWDILDFLAKTVMCIWNWEWGT VHNFLKLL  |
| 1363 | 13.30 (Beaver)  | GLILESLVGHFTGQASTMDLSTALS ASK-----                              |
| 1364 | 13.14 (Beaver)  | GQILETLVGHFTRQASTMAVSRALS VYR-----                              |
| 1365 | Pla2g4c (Mouse) | EQFLDHLDDRFRKKTQEDTTYS LMNWNNTGLVWDRCVFVNTRKCVSKWQGT VYVNFYK-   |
| 1366 | PLA2G4C (Human) | EQPHEDPE-----RKGSLSNLMDFVKKTGICASKWEWGTTHNFYK-                  |
| 1367 |                 |                                                                 |
| 1368 | 14.34 (Beaver)  | -CSNVCITDEDMCSRKLLHLVDAGLAINSPYPLLLPPAREVQLILS FDFS DGDPPFETVRA |
| 1369 | 14.18 (Beaver)  | YGSRVGVTDDEMCSRKLLHLVDAGLAINSPYPLLLPPAREVQLILS FDFS AGDPPFETVRA |
| 1370 | 13.30 (Beaver)  | -CSNISITDEDMCSRKLLHLVDAGLAINSPYPLLLPPAREVQLILS FDFS DGDPPFETVRA |

1371 13.14 (Beaver) -GSRVGVTDNEMYSRKLLHLVDAGLAINSPYPLLLPPAREVQLILSFDFSAGDPFETVRA  
1372 Pla2g4c (Mouse) ---HGKIADETMCSRELLHLVDAGFAINTPYPLVLPVRETHLILSFDFSAGDPLETIRA  
1373 PLA2G4C (Human) ---HGGIRDKIMSSRKHLLHLVDAGLAINTPFPLVLPPTREVHLILSFDFSAGDPFETIRA  
1374  
1375 14.34 (Beaver) TADYCHHHKIPFPLVKEADLKEWAEAPTSCYILKGESGPFVMHFPLFNKDNCGDDINTWR  
1376 14.18 (Beaver) TADYCYRHKIPFPLVKEADLKEWAKAPSSCYILKGESGPFVMHFPLFNKDNCGDDINTWR  
1377 13.30 (Beaver) TADYCHHHKIPFPLVKEADLKEWAEAPTSCYILKGESGPFVMHFPLFNKDNCGDEINTWR  
1378 13.14 (Beaver) TADYCYRHKIPFPLVKEADLKEWAKAPSSCYILKGESGPFVMHFPLFNKDNCGGDI STWR  
1379 Pla2g4c (Mouse) TADYCYRHEIPFPEVSEDQLKEWAKAPASCYVLRGETGPVVMHFPLFNKDNCGDDIETWR  
1380 PLA2G4C (Human) TTDYCRRHKIPFPQVEEAELDLWSKAPASCYILKGETGPVVMHFPLFNIDACGGDIEAWS  
1381  
1382 14.34 (Beaver) DKYGTFKLSDTYSVQLVKDLLEKSKENVRKNKEKIIRTIKEVVG-----  
1383 14.18 (Beaver) DKYATFKLSDTYSVQLVKDLLEKSKENVRKNKENIFRAIKEAVRSCPQTS-----  
1384 13.30 (Beaver) EKYGTFKLSDTYSVQVVKDLLEKSKENVRKNKEKIIRTIKEVVG-----  
1385 13.14 (Beaver) DKYATFKLSDTYSVQVVKDLLEKSKENVRKNKEKIIRTIKEVVG-----  
1386 Pla2g4c (Mouse) KKYGTVKLSDSYTPDLVRDLLRVSKENVKKNKINILSEMRKVAGNPGNIPRVNKEACLGD  
1387 PLA2G4C (Human) DTYDTFKLADTYTLDVVVLLLALAKKNVRENKKKILRELMNVAGLYYPKD-SARSCCLA\*  
1388  
1389 14.34 (Beaver) -----  
1390 14.18 (Beaver) -----  
1391 13.30 (Beaver) -----  
1392 13.14 (Beaver) -----  
1393 Pla2g4c (Mouse) RVKDPQGSQTVEFKKSHNISKD\*  
1394 PLA2G4C (Human) -----  
1395  
1396 **C**

| Gene  | B1 | B2 | B3 | B4  |
|-------|----|----|----|-----|
| 13.14 | 0  | 1  | 3  | 0   |
| 13.30 | 0  | 0  | 6  | 2   |
| 14.18 | 0  | 3  | 10 | 102 |
| 14.34 | 5  | 0  | 7  | 2   |

The amino acid letters with grey background (panel B) show where we checked the RNA-Seq reads coverage on the corresponding genome loci.

1397

1398 **Figure S11. Related to Figure 4. Duplication of *Pla2gc*. A)** Gene structure of beaver *Pla2gc*.  
1399 **B)** Protein sequence alignment. Sequences with grey background show where we check the  
1400 RNA-Seq reads coverage. **C)** RNA-Seq reads coverage at unique sites. Consistent with genome  
1401 sequencing result and qPCR also showed there are duplication of *Pla2gc* in beaver genome  
1402 (**Figure 4A**). However, we did not observe 4 times signals by qPCR. It may be because the  
1403 primer we designed do not perfectly match sequences from each of those copies. The exact copy  
1404 number of *Pla2gc* in beaver genome need further exploration.



1405

**A**

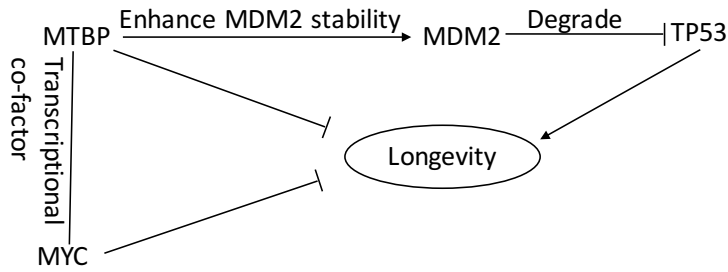

1406

1407

**B**

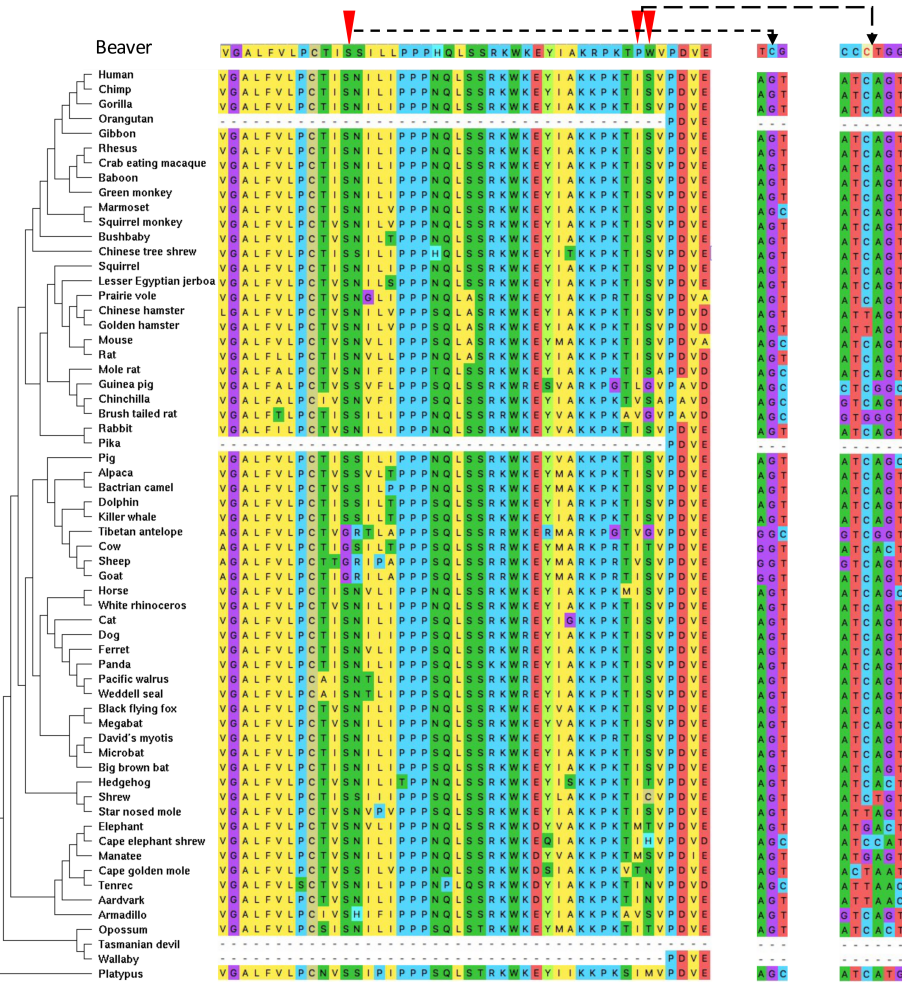

1408

1409

**C**

| Position | Codon |        | Num. of mammals | AF in humans | CADD |
|----------|-------|--------|-----------------|--------------|------|
|          | Human | Beaver |                 |              |      |
| 1        | A     | T      | 0               | 0            | 22.8 |
| 2        | G     | C      | 0               | 0            | 22.4 |
| 3        | T     | G      | 0               | 0            | 20.6 |

1410

1411 **D**

| Amino acid (codon) |              | RROVEAN | PolyPhen2 | CADD         |
|--------------------|--------------|---------|-----------|--------------|
| Human              | Other        |         |           |              |
| I (ATC)            | P (CCC)      | -3.51   | 0.916     | 23.0         |
|                    | L (CTC)      | -0.44   | 0         | 13.32        |
|                    | V (GTC; GTG) | -0.47   | 0.005     | 12.83; 14.90 |
|                    | M (ATG)      | -1.14   | 0.005     | 14.33        |
|                    | T (ACT)      | -2.28   | 0.275     | 19.95        |
| S (AGT)            | W (TGG)      | -2.94   | 0.948     | 21.7         |
|                    | G (GGC; GGT) | -1.31   | 0.000     | 11.21; 12.00 |
|                    | T (ACT)      | -0.09   | 0.000     | 0.779        |
|                    | C (TGT)      | -1.81   | 0.001     | 13.56        |
|                    | H (CAT)      | -1.83   | 0.614     | 13.07        |
|                    | N (AAC; AAT) | -0.81   | 0.000     | 6.38; 4.25   |
|                    | M (ATG)      | -1.76   | 0.020     | 9.42         |

1412

1413 **Figure S12. Related to Figure 5. MTBP function and positive selection.** (A) Functional  
 1414 interaction among MTBP and other genes related to longevity or cancer. MTBP enhances MDM2  
 1415 stability by inhibiting auto-ubiquitination of MDM2, which in turn promotes TP53 degradation  
 1416 through MDM2-mediated ubiquitination of TP53. MTBP and MYC are transcriptional co-factors.  
 1417 Decreased expression of either MTBP and MYC show increased longevity and enhanced health-  
 1418 span(Hofmann, Zhao et al. 2015, Grieb, Boyd et al. 2016). (B) Alignment of 62 mammalian species  
 1419 at the three sites likely under positive selection in beavers. These three sites have selection  
 1420 probabilities higher than 88%. The alignment were extracted from 100-way vertebrates' alignments.  
 1421 (C) One codon (S:TCG) under positive selection in beavers. It is a synonymous change (S/S:  
 1422 TCG/AGT) between human and beaver. 'Num. of mammals' is the number of mammalian species  
 1423 (among the 62 in the phylogeny) with the same nucleotide as beavers. 'AF in humans' is the  
 1424 frequency of the allele in humans identical to the nucleotide in beavers from gnomAD(Karczewski,  
 1425 Francioli et al. 2019). The CADD score quantifies the deleteriousness of the sequence change  
 1426 between human and beaver at each nucleotide position in the codon. A CADD score greater than  
 1427 20 indicates a very likely deleterious change. (D) Other two codons (P:CCC and W:TGG) under  
 1428 positive selection in beavers. They are both non-synonymous change (P/I: CCC/ATC and W/S:  
 1429 TGG/AGT) between human and beaver. We predicted the functional effects of the non-  
 1430 synonymous changes between human and other mammalian species including beaver. Green  
 1431 letters are nucleotide changes from the human codons. PROVEAN scores lower than -2.5 indicate  
 1432 deleterious changes, which Polyphen2 scores between 0.85 to 1.0 indicate damaging changes.

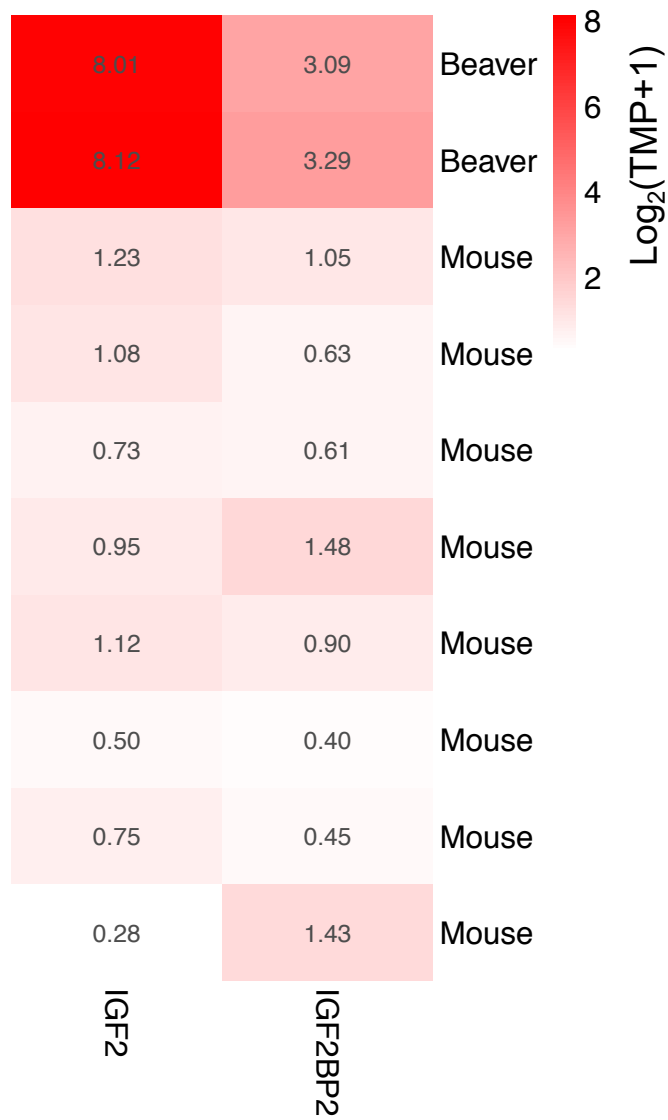

1433

1434 **Figure S13. Related to Figure 6. Comparison of *Igf2* and *Igf2bp2* expression between**  
 1435 **beavers and mice.**

1436

1437

**A**

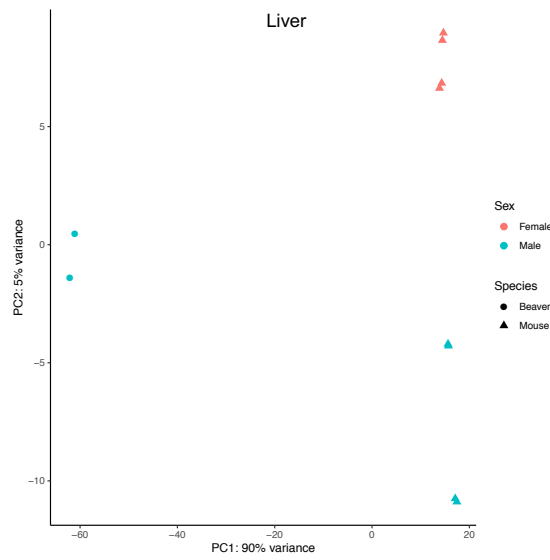

**B**

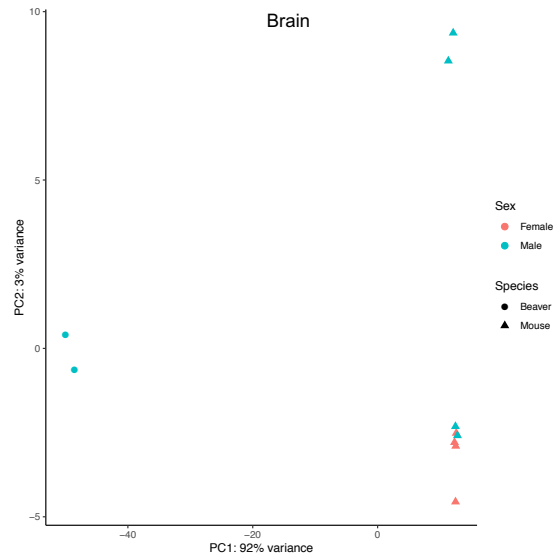

1438

1439 **Figure S14. Related to Figure 6. Principle component analysis of RNA-Seq data from**  
1440 **beavers and mice. (A) Liver. (B) Brain.**

**Table S1.** RNA-Seq data from four beaver samples.

| Sample | Source      | Sex    | Age         | Tissue    | Num. of reads |
|--------|-------------|--------|-------------|-----------|---------------|
| B1     | Wild-caught | Male   | Young adult | Brain     | 23,287,737    |
|        |             |        |             | Liver     | 22,152,280    |
| B2     | Wild-caught | Male   | Young adult | Brain     | 22,888,968    |
|        |             |        |             | Liver     | 23,371,745    |
| B3     | Toronto Zoo | Male   | 10 years    | Leukocyte | 120,041,781   |
|        |             |        |             | Muscle    | 165,598,655   |
| B4     | Wild-caught | Female | NA          | Pooled    | 30,977,152    |

B1 & B2 are from our own study. B3 was from (Lok, Paton et al. 2017). B4 was from the beaver genome project in Oregon University who generated RNA-seq data from pooled 16 tissues: skeletal muscle, kidney, spleen, ovaries, placenta, castor gland, tail, toe webbing, whole blood, brain, lung, liver, heart, stomach, tongue, intestine.

1441

1442

**Table S2.** qPCR primers.

| Gene target    | Forward primer Sequence (5'→3') | Reverse primer Sequence (5'→3') |
|----------------|---------------------------------|---------------------------------|
| <i>Aldh1a1</i> | GACAGGCTTCCAGATTGGTTCTC         | CTAGCAGCAGACGATCTCTTTCAAT       |
| <i>Cenpt</i>   | TTCAGAGCCTTTGGAGCCTAT           | GTCCAGCCTTGTAGGGATCTT           |
| <i>Cyp19a1</i> | CATGTGGAGACATTGCGAGG            | ATTTCCAGCAGGTCACCTCGT           |
| <i>Fitm1</i>   | TCTGCCTTGCTGTATTTTGGA           | ATGGTAGAGGGCGCCGTAAG            |
| <i>Hpgd</i>    | TGAAGATGATGGCTTAAATGGTGCT       | GAGATGGAGGTGGGTCATACTC          |
| <i>Pla2g4c</i> | TCCAGGGCTCTCTTTTGCCAG           | AACCAGGGTGAAGGTCATTATCAA        |
| <i>Hcfc1</i>   | CCGTTAGTCACCATGCGACC            | GTGGGCACAACCATTTCGCAC           |
| <i>Pelo</i>    | TCCACTATCCGCAAGGTTTCAG          | GGCTTGGGAGTCAAAGTCGAT           |

1443
